# Supplementary material for: Deep-learning-based single-domain and multidomain protein structure prediction with D-I-TASSER
Source: Springer Nature journal article supplement (doi:10.1038/s41587-025-02654-4), 2025-05-23
Supplement: MOESM1 [file 41587_2025_2654_MOESM1_ESM.pdf]

# Deep-learning-based single-domain and multidomain protein structure prediction with D-I-TASSER

---

In the format provided by the  
authors and unedited

---

# Supplementary Information

## Table of Contents

### Texts S1-S5

- Text S1.** Databases used in DeepMSA2.  
**Text S2.** dMSA, qMSA, and mMSA pipelines used in DeepMSA2.  
**Text S3.** The definition of Zscore used in LOMETS3 pipeline.  
**Text S4.** Five contact predictors used in D-I-TASSER.  
**Text S5.** D-I-TASSER force field E-groups2-7.

### Figures S1-S13

- Fig. S1.** Structural modeling of 2-C-methyl-D-erythritol 2,4-cyclodiphosphate synthase using various I-TASSER workflows.  
**Fig. S2.** The average RMSDs between the top five models generated by D-I-TASSER and those by AlphaFold2 on disordered regions lacking experimentally determined structures.  
**Fig. S3.** Application of D-I-TASSER to multi-state modeling of the SARS-CoV-2 Spike protein.  
**Fig. S4.** The relationship between *Neff* and TM-score of D-I-TASSER models on CASP15 targets.  
**Fig. S5.** Summary of the protein lengths and experimental structure coverage for the human proteome dataset.  
**Fig. S6.** Number of human proteins at each stage of the analysis, where each set is a subset of the previous set.  
**Fig. S7.** Frequency analysis of the most commonly predicted functions for proteins in the human proteome arising from our pipeline.  
**Fig. S8.** Statistics on human proteome dataset.  
**Fig. S9.** Schematic of the DeepMSA2 pipeline.  
**Fig. S10.** Definition of hydrogen bonds used by D-I-TASSER.  
**Fig. S11.** Schematics of the modeling and simulation settings in D-I-TASSER.  
**Fig. S12.** Illustrations of distance and hydrogen bond potentials for three different situations.  
**Fig. S13.** Comparison of time requirements for D-I-TASSER and AlphaFold2 on different size proteins.

### Tables S1-S13

- Table S1.** Comparison of modeling results by D-I-TASSER with other methods for different target types on the 1,262 benchmark datasets.  
**Table S2.** The contributions of different spatial restraints used in I-TASSER folding simulations to the final modeling results, compared with different versions of AlphaFold (including AlphaFold3, AlphaFold2.3, AlphaFold2.2, AlphaFold2.1, and AlphaFold2.0) for all 500 Hard targets in Benchmark-I dataset.  
**Table S3.** The comparison of D-I-TASSER with different versions of AlphaFold (including AlphaFold3, AlphaFold2.3, AlphaFold2.2, AlphaFold2.1, and AlphaFold2.0) for 176 Hard targets released after May 1, 2022.  
**Table S4.** Comparison of full-chain-level modeling results by D-I-TASSER, AlphaFold2, and AlphaFold2+DeepMSA2 on the 230 multi-domain targets with different number of domains.  
**Table S5.** Comparison of domain-level modeling results between D-I-TASSER, AlphaFold2, and AlphaFold2+DeepMSA2 on the 557 domains that came from 230 multi-domain targets.  
**Table S6.** Comparison of the structure prediction abilities of D-I-TASSER, NBIS-AF2-standard (AlphaFold2), and Wallner group predictions on 62 Template-based modeling (TBM) and 50 Free Modeling (FM) domains from the CASP15 experiment.  
**Table S7.** Comparison of structure predictions by D-I-TASSER, NBIS-AF2-standard (AlphaFold2), and Wallner group predictions on 55 single-domain and 22 multi-domain targets from the CASP15 experiment.  
**Table S8.** Results of all 132 groups (server and human) on ‘Single-domain Structure Prediction’ in CASP15.  
**Table S9.** Results of all 98 groups (server and human) on ‘Inter-domain Structure Prediction’ in CASP15.

- Table S10.** The comparison of D-I-TASSER with different versions of AlphaFold (including AlphaFold3, AlphaFold2.3, AlphaFold2.2, AlphaFold2.1, and AlphaFold2.0) on 50 Free Modeling (FM) domains and 22 multi-domain targets from the CASP15 experiment.
- Table S11.** The structure prediction accuracy of D-I-TASSER and AlphaFold2 on 1,907 full-chain sequences from the human genome that have experimentally solved structures.
- Table S12.** The results are the same as shown in Table S9, but the 1,907 proteins are categorized into two categories of ‘Easy-zone’ and ‘Hard-zone’ based on the D-I-TASSER and AlphaFold2 results.
- Table S13.** Statistical summary of top 20 most abundant prediction results for ligand-binding interactions, EC terms, and GO terms (BP, CC, and MF) for foldable full-chain human proteins.

## References

## Supplementary Text

### Text S1. Databases used in DeepMSA2

Sequence databases used in DeepMSA2 are categorized into two groups: genome and metagenome databases. For genome sequence databases, both **Uniclust30** and **UniRef30** contain HHblits-style Hidden Markov Model (HMM) profiles, where protein sequences in UniProtKB<sup>1</sup> are clustered at a threshold of 30% pairwise sequence identity employing MMseqs2<sup>2</sup>. Uniclust30 is the version of the database generated before 2019, while UniRef30 was created after 2019. **Uniref90** offers sequences sourced from UniProtKB, meticulously clustered at a threshold of 90% pairwise sequence identity utilizing MMseqs2. Within each cluster, the representative sequence is exclusively retained in the database, ensuring optimal representation. In total, those three genomics sequence databases contain 464 million sequences.

For metagenome databases, **Metaclust** was devised through the clustering and amalgamation of approximately 1.59 billion protein sequence fragments, which are predicted by Prodigal<sup>3</sup>, sourced from around 2,200 metagenomics and meta-transcriptomic datasets acquired from JGI<sup>4</sup>. The clustering was carried out with a 50% sequence identity threshold, while ensuring a coverage of 90%. **Mgnify** was collected by the EBI Metagenomics project<sup>5</sup> and was clustered by MMseqs2 using coverage and sequence identity threshold at 90%. **BFD** is an HHblits-style HMM database that was created by clustering 2.5 billion protein sequences from UniProtKB30, Metaclust, soil reference catalog, and marine eukaryotic reference catalog assembled by Plass<sup>6</sup> using MMseqs2 with 30% pairwise sequence identity. Those three third-party metagenomics sequence databases contain ~3.2 billion sequences.

In addition, three additional metagenomics sequence databases, TaraDB, MetaSourceDB, and JGIclust were newly created for DeepMSA2. The three in-house databases, which were built using data collected from EBI Metagenomics project and the Joint Genome Institute (JGI), contain in total 35.6 billion sequences, which are approximately 11 times as large as the above-mentioned three third-party metagenomics databases (~3.2 billion). Among them, **TaraDB** was created from the ‘Tara Oceans’ project hosted on EBI Metagenomics with 245 metagenomics sequencing runs (<https://www.ebi.ac.uk/metagenomics/studies/ERP001736>). The raw read sequences were assembled by MEGAHIT v1.0 to contigs and only the contigs with >500 nucleotides were selected. Next, Prodigal (v2.6) was used with parameters ‘-c -m p meta’ to identify ORFs from metagenome data and translate the gene to protein productions. Finally, CD-HIT (v4.6)<sup>7</sup> was utilized to cluster protein sequences in each sample, and the sequence identity threshold was set to 95% to remove the identical sequence. Next, **MetaSourceDB** collected metagenome data from four large environmental biomes from the EBI. Those four biomes, including ‘Fermentor’, ‘Soil’, ‘Lake’, and ‘Gut’, cover all typical biomes of the EBI database. In total, 1,705 high-quality samples were selected, assembled, and clustered by the similar pipeline used in Tara DB. In addition to Prodigal, FragGeneScan (v1.20)<sup>8</sup> was also used to predict ORFs from assembled contigs to avoid missing the short sequences. Finally, **JGIclust** was created from Joint Genome Institute (JGI), containing ~25,000 metagenomics and meta-transcriptomic samples. For each project, the assembled protein sequences (\*.assembled.faa) were downloaded and clustered with 90% sequence identity at 90% coverage by MMseqs2. For each cluster of one project, only the representative sequence was kept in the in-house JGIclust database. To further remove the redundancy, MetaSourceDB, TaraDB, and JGIclust were iteratively clustered to 50% identity using MMseqs2’s linear cluster pipeline. Coverage was set at 0.8, using ‘—cov-mode 1’. Due to the storage and memory limitation, the entire sequence database was split to difference small chunks (<100GB) and clustered using the iterative greedy strategy. These chunks were merged into larger chunks, ensuring the merged databases did not exceed 200GB and the merged chunks were then re-clustered to 50% identity. The final large chunks that cannot further be merged were pairwise clustered. Redundant sequences were removed after each clustering round before proceeding to the next pairwise clustering. The process culminated in the final database clustered at 50% identity.

### Text S2. dMSA, qMSA, and mMSA pipelines used in DeepMSA2

**dMSA** (which a short name of the original DeepMSA pipeline<sup>9</sup>) is comprised of three stages. In Stage 1, HHblits<sup>10</sup> from the HH-suite package<sup>11</sup> is used to search the query sequence against the Uniclust30 database<sup>12</sup> to generate the first-level MSA. If there are not enough homologous sequences in the first-level MSA, i.e., the number of effective sequences (*Neff*) of the first-level MSA generated by Stage 1 is <128, Stage 2 will be performed. In Stage 2, Jackhmmer from the HMMER package<sup>13</sup> is used to search the query sequence against the UniRef90 database<sup>14</sup> to generate homologous sequences (hits) for the construction of a custom HHblits-formatted database. Using the first-level MSA as input, HHblits is again applied to search against the custom database to generate the second-level MSA. If the *Neff* of the second-level MSA is still <128, Stage 3 will be performed. In Stage 3, similar to Stage 2, the second-level MSA is used to jump-start an HHblits search against a new custom HHblits-formatted database to get the third-

level MSA. The new custom database in Stage 3 is built by HMMsearch from HMMER to search a profile Hidden Markov Model (HMM) built by HMMbuild from the HMMER package against the Metaclust<sup>15</sup> metagenome sequence database.

**qMSA** (which stands for “quadruple MSA”) contains four stages to perform Hhblits2, Jackhmmmer, Hhblits3, and HMMsearch searches against UniRef30 (version 2020\_01), UniRef90, BFD, and Mgnify, respectively. The sequence hits from Jackhmmmer, Hhblits3 and HMMsearch in Stage 2, 3 and 4 of qMSA are converted into an Hhblits-formatted database, against which the Hhblits2 search is performed using the MSA input from the previous stage.

**mMSA** (which stands for “multi-level MSA”) utilizes the alignment in Stage 3 of qMSA as a probe by HMMsearch to search through the in-house metagenomics sequence databases (TaraDB, MetaSourceDB and JGIclust), and the resulting sequence hits are converted into a new sequence database. This database is then used as the target database, which is searched by Hhblits2 with three seed MSAs (MSAs from stage 2 of dMSA, and stages 2 and 3 of qMSA), to derive three new MSAs.

### Text S3. The definition of Zscore used in LOMETS3 pipeline

The  $Zscore(i, j)$  in the above scoring function includes three score terms from contacts, distances, and hydrogen bond geometries predicted by AttentionPotential and DeepPotential, and one sequence profile score term from the original profile-based threading methods as follows:

$$Zscore(i, j) = w_1 Zscore^{MAE}(i, j) + w_2 Zscore^{CMO}(i, j) + w_3 Zscore^{HB}(i, j) + w_4 Zscore^{prof}(i, j) \quad (S1)$$

where  $Zscore^{MAE}(i, j)$  is the Zscore of the mean absolute error (MAE) based on the predicted distance map,  $Zscore^{CMO}(i, j)$  is the Z-score of the number of overlapping contacts based on the predicted contact map (CMO),  $Zscore^{HB}(i, j)$  is the Z-score based on the predicted hydrogen bond geometry (HB), and  $Zscore^{prof}(i, j)$  is a score which is based on the original profile threading scores. The formulas of these four Z-scores are as follows:

$$Zscore^{MAE}(i, j) = \frac{-MAE(i, j) - \langle -MAE(j) \rangle}{\sigma(-MAE(j))} \quad (S2)$$

$$MAE(i, j) = \frac{\sum_{m,n}^{ali} [\delta(m, n) |d_{m,n}^{query} - d_{m,n}^{template}| + (1 - \delta(m, n)) GapPenalty]}{\sum_{m,n}^{ali} \delta(m, n)} \quad (S3)$$

where  $d_{m,n}^{query}$  is the predicted distance between residue  $m$  and  $n$  in the query structure,  $d_{m,n}^{template}$  is the predicted distance between residue  $m$  and  $n$  in the template structure,  $GapPenalty = 1$ ,  $ali$  means the length of alignment, and  $\delta(m, n) = \begin{cases} 1, & m \text{ and } n \text{ are not gap} \\ 0, & \text{else} \end{cases}$ .  $\langle -MAE(j) \rangle$  and  $\sigma(-MAE(j))$  are the average and standard deviation of the MAE scores across all templates for the  $j$ -th program, respectively.

$$Zscore^{CMO}(i, j) = \frac{CMO(i, j) - \langle CMO(j) \rangle}{\sigma(CMO(j))} \quad (S4)$$

$$CMO(i, j) = \frac{N(Overlap(CM^{query}, CM^{template}))}{N(CM^{query})} \quad (S5)$$

where  $N(Overlap(CM^{query}, CM^{template}))$  is the number of overlapping contacts between the predicted contact map and the contact map derived from the aligned template, and  $N(CM^{query})$  is the number of predicted contacts.  $\langle CMO(j) \rangle$  and  $\sigma(CMO(j))$  are the mean and standard deviation of the contact overlap scores across all templates for the  $j$ -th program, respectively.

$$Zscore^{HB}(i, j) = \frac{HBscore(i, j) - \langle HBscore(j) \rangle}{\sigma(HBscore(j))} \quad (S6)$$

$$HBscore(i, j) = \sum_{m,n}^{ali} \frac{1}{1 + \left( \frac{\min(|\theta_{m,n}^{query} - \theta_{m,n}^{template}|, \pi - |\theta_{m,n}^{query} - \theta_{m,n}^{template}|)}{\theta} \right)^2} \quad (S7)$$

where  $\theta_{m,n}^{query}$  is the predicted hydrogen bond angle between residue  $m$  and  $n$  in the query structure,  $\theta_{m,n}^{template}$  is the predicted hydrogen bond angle between residue  $m$  and  $n$  in the template structure, and  $\theta = 15$ .  $\langle HBscore(j) \rangle$  and  $\sigma(HBscore(j))$  are the average and standard deviation of the alignment scores across all templates for the  $j$ -th program, respectively.

$$Zscore^{prof}(i, j) = \frac{S(i, j) - \langle S(j) \rangle}{\sigma(S(j))} \quad (S8)$$

where  $S(i, j)$  is the alignment score of the  $i$ -th template for the  $j$ -th program, and  $\langle S(j) \rangle$  and  $\sigma(S(j))$  are the average and standard deviation of the alignment scores across all templates for the  $j$ -th program, respectively.

#### Text S4. Five contact predictors used in D-I-TASSER

In addition to contact predictions from AttentionPotential and DeepPotential, D-I-TASSER also utilizes contact map information from TripletRes<sup>16</sup>, ResTriplet<sup>17</sup>, ResPRE<sup>18</sup>, ResPLM<sup>17</sup>, and NeBcon<sup>19</sup>, the methods of which are outlined below.

**TripletRes** (<https://zhanggroup.org/TripletRes>)<sup>16</sup> is a recently developed contact map predictor, which we used in CASP13. It is noteworthy that the TripletRes method was ranked as the top contact predictor in the CASP13 experiment<sup>20</sup>. Starting from multiple sequence alignments created by DeepMSA2 (see “Text S2”), three co-evolutionary features are extracted and then ensembled directly by residual neural networks. Each input feature is fed into a set of residual blocks and transformed into the output feature with 64 channels. The three output features are concatenated along the channel dimension as the input of the last layers. The last set of layers try to learn patterns from the three transformed features using another 12 residual blocks. All residual blocks have a channel size of 64, and the kernel size of the convolutional layers is set to  $3 \times 3$  with a padding size equal to one. Such a padding parameter set-up can keep the spatial information fixed through different layers. Here, we use a convolutional layer with a  $1 \times 1$  kernel size to transform each co-evolutionary input feature and the concatenated features into 64 channels. The final contact map prediction is obtained by a sigmoid activation function.

**ResTriplet**<sup>17</sup> is another recent contact map predictor, which we used in CASP13. ResTriplet is a two-stage ensemble model that uses a stacking strategy. In Stage I, three individual base models are trained separately based on the three different sets of co-evolutionary features, PRE, PLM and COV, respectively as described above. The base models have the same training data and the same neural network structure consisting of 22 residual basic blocks. In Stage II, we use a shallow neural network structure to combine the predictions of the base models from Stage I. Thus, the predicted contact maps from the base models are considered as the input features in Stage II. To reduce the risk of over-fitting, predicted contact maps produced by each base model are generated by 10-fold cross-validation as the input features of Stage II. The predicted secondary structures, denoted as PSS, obtained using PSIPRED<sup>21</sup> are also adopted as an extra feature for the neural network model in Stage II. For shallow convolutional neural networks, the size of the receptive fields is usually limited. Hence, a dilated convolutional neural network structure with dilation equal to 2 is employed in order to enlarge the size of the receptive fields.

**ResPRE** (<https://zhanggroup.org/ResPRE>)<sup>18</sup> is a novel in-house contact map predictor, which consists of two consecutive steps of precision matrix-based feature generation and deep residual neural network-based contact inference. ResPRE is the average ensemble of ten base models trained by different subsets of the whole training data.

**ResPLM**<sup>17</sup> is another contact map predictor similar to ResPRE. The only difference is that ResPLM was trained using the PLM feature.

**NeBcon** (<https://zhanggroup.org/NeBcon>)<sup>19</sup> is a meta-approach designed for contact map prediction. In this study, we retrained NeBcon to improve its long-range contact prediction precision by using the a naïve Bayes classifier (NBC) to integrate eight state-of-the-art contact prediction methods, including four deep learning-based methods: DeepPLM<sup>17</sup>, DeepCov<sup>22</sup>, Deepcontact<sup>23</sup>, and DNCON2<sup>24</sup>, three co-evolution-based methods: GREMLIN<sup>25</sup>, CCMpred<sup>26</sup>, and FreeContact<sup>27</sup>, and one meta-server-based methods MetaPSICOV2<sup>28</sup>. NeBcon has two variants, NeBconA and NeBconB, designed for  $C_\alpha$  and  $C_\beta$  atoms, respectively.

#### Text S5. D-I-TASSER force field E-groups2-7

##### E-Group2: Template-based restraints

Four types of restraints have been derived from the LOMETS3 templates and used to guide the D-I-TASSER simulations.

**Template-based short-range distance restraints.** This energy term considers only the short-range interactions which occur for  $|i-j| \leq 6$  for the  $i$ -th and  $j$ -th residues of the model.

$$E_{dist}^{Short} = \sum_{i=1}^{L-1} \sum_{j>i}^{i+6} E_{dist}^{Short}(d_{ij}) \quad (S9)$$

$$E_{dist}^{Short}(d_{ij}) = \begin{cases} 1, & \text{if } |d_{ij} - d_{ij}^T| > \sigma_{ij}^T \\ 0, & \text{otherwise} \end{cases} \quad (S10)$$

where  $d_{ij}$  is the  $C_\alpha$  distance between the  $i$ -th and  $j$ -th residues of the model.  $d_{ij}^T$  and  $\sigma_{ij}^T$  are the average and the mean square deviation of the  $C_\alpha$  distances, respectively, between the  $i$ -th and  $j$ -th residues that are collected from the threading templates.

**Template-based long-range distance restraints.** This energy term considers only the long-range interactions for  $|i-j| > 6$  for the  $i$ -th and  $j$ -th residues of the model.

$$E_{dist}^{Long} = \sum_{i=1}^{L-7} \sum_{j>i+6}^L E_{dist}^{Long}(d_{ij}) \quad (S11)$$

$$E_{dist}^{Long}(d_{ij}) = -\frac{1}{\max(1, |d_{ij} - d_{ij}^T|)} \quad (S12)$$

where  $d_{ij}$  is the  $C_\alpha$  distance between the  $i$ -th and  $j$ -th residues of the model.  $d_{ij}^T$  is the average of the  $C_\alpha$  distances between the  $i$ -th and  $j$ -th residues collected from the threading templates.

**Template-based contact restraints for  $C_\alpha$ .** This energy term considers the contact information corresponding to  $C_\alpha$  atoms, which is extracted from the templates.

$$E_{Tcon}^{C\alpha} = \sum_{i=1}^{L-1} \sum_{j>i}^L E_{Tcon}^{C\alpha}(d_{ij}) \quad (S13)$$

$$E_{Tcon}^{C\alpha}(d_{ij}) = \begin{cases} -U_{ij}, & \text{if } d_{ij} < 6.5\text{\AA} \\ 0, & \text{otherwise} \end{cases} \quad (S14)$$

$$U_{ij} = \begin{cases} 1 + 4 * |conf_{ij}^{C\alpha} - conf_{cut}^{C\alpha}|, & \text{if } conf_{ij}^{C\alpha} > conf_{cut}^{C\alpha} \\ 1 - 2 * |conf_{ij}^{C\alpha} - conf_{cut}^{C\alpha}|, & \text{otherwise} \end{cases} \quad (S15)$$

where  $d_{ij}$  is the  $C_\alpha$  distance between the  $i$ -th and  $j$ -th residues of the model;  $conf_{ij}^{C\alpha}$  is the contact confidence score for the  $i$ -th and  $j$ -th  $C_\alpha$  atoms of the model, where the confidence scores are based on the threading results;  $conf_{cut}^{C\alpha}$  is the pre-tuned cut-off value for the contact confidence score for  $C_\alpha$  atoms, which is query type-dependent.

**Template-based contact restraints for the center of side-group heavy atoms (SG).** This energy term considers the contact information corresponding to the center of side-group heavy atoms, which is extracted from the templates.

$$E_{Tcon}^{SG} = \sum_{i=1}^{L-1} \sum_{j>i}^L E_{Tcon}^{SG}(d_{ij}^{SG}) \quad (S16)$$

$$E_{Tcon}^{SG}(d_{ij}^{SG}) = \begin{cases} -U_{ij}^{SG}, & d_{ij}^{SG} < d_{cut}^{SG}(AA_i, AA_j) \\ -\frac{1}{2} U_{ij}^{SG} \left[ 1 - \sin \left( \frac{d_{ij}^{SG} - \left( \frac{d_{cut}^{SG}(AA_i, AA_j) + D}{2} \right)}{D - d_{cut}^{SG}(AA_i, AA_j)} \pi \right) \right], & d_{cut}^{SG}(AA_i, AA_j) \leq d_{ij}^{SG} < D \\ \frac{1}{2} U_{ij}^{SG} \left[ 1 + \sin \left( \frac{d_{ij}^{SG} - \left( \frac{D + 80}{2} \right)}{(80 - D)} \pi \right) \right], & D \leq d_{ij}^{SG} < 80\text{\AA} \\ U_{ij}^{SG}, & d_{ij}^{SG} \geq 80\text{\AA} \end{cases} \quad (S17)$$

$$U_{ij}^{SG} = \begin{cases} 1 + 4 * |conf_{ij}^{SG} - conf_{cut}^{SG}|, & \text{if } conf_{ij}^{SG} > conf_{cut}^{SG} \\ 1 - 2 * |conf_{ij}^{SG} - conf_{cut}^{SG}|, & \text{otherwise} \end{cases} \quad (S18)$$

where  $d_{ij}^{SG}$  is the distance between the  $i$ -th and  $j$ -th centers of the side-group heavy atoms in the model;  $conf_{ij}^{SG}$  is the contact confidence score for the  $i$ -th and  $j$ -th pseudo side-group heavy atoms in the model, where the confidence scores are based on the threading results;  $conf_{cut}^{SG}$  is the pre-tuned cut-off value for the contact confidence score for the centers of the side-group heavy atoms, which is query type-dependent.  $D = 2 + d_{cut}^{SG}(AA_i, AA_j)$ , where  $d_{cut}^{SG}(AA_i, AA_j)$  is an amino acid type-dependent cut-off value for the center of side-group heavy atoms.

### E-Group3: Burial interaction restraints

This potential represents the general propensity of amino acids to be buried or exposed to the solvent.

$$E_{burial}^{SG} = -\sum_{i=1}^L E(x_i, y_i, z_i) * P(ASA_i) \quad (S19)$$

$$E(x_i, y_i, z_i) = \min(0, \max(-1, \frac{(x_i - x_c)^2}{x_0^2} + \frac{(y_i - y_c)^2}{y_0^2} + \frac{(z_i - z_c)^2}{z_0^2} - 2.5)) \quad (S20)$$

where  $P(ASA_i)$  is the accessible surface (ASA) of the  $i$ -th residue predicted through PSSpred<sup>29</sup>. If the  $i$ -th residue is predicted as buried, the value of  $P(ASA_i)$  is made negative.  $(x_i, y_i, z_i)$  is the coordinate for the center of the side-

group heavy atoms (SG) for the  $i$ -th residue.  $(x_0, y_0, z_0)$  is the length of the principal axes of the protein ellipsoid, and  $(x_c, y_c, z_c)$  is the center of the protein ellipsoid<sup>30</sup>.

#### E-Group4: Secondary structure-based restraints

**Secondary structure restraints for  $C_\alpha$ .** These three potential terms try to encourage local structures to form local secondary structures, where the secondary structure information for the query protein is predicted by PSSpred<sup>29</sup>.

$$E_{sec}^{C\alpha} = w_{sec1} \sum_{i=1}^{L-4} E_{sec}^{C\alpha}(d_{i,i+4}) + w_{sec2} \sum_{i=1}^{L-4} E_{sec}^{C\alpha}(\vec{B}_i, \vec{B}_{i+4}) + w_{sec3} \sum_{i=1}^{L-2} E_{sec}^{C\alpha}(\vec{C}_i, \vec{C}_{i+2}) \quad (S21)$$

$$E_{sec}^{C\alpha}(d_{i,i+4}) = \begin{cases} -2 - \frac{DF_i * DF_{i+1} + DF_{i+3} * DF_{i+4}}{2}, & \text{if } \alpha - \text{helix} \\ -2 - (DF_i * DF_{i+1} + DF_{i+3} * DF_{i+4}), & \text{if } \beta - \text{sheet} \\ 0, & \text{otherwise} \end{cases} \quad (S22)$$

$$E_{sec}(\vec{B}_i, \vec{B}_{i+4}) = \begin{cases} -\frac{DF_i * DF_{i+1} + DF_{i+3} * DF_{i+4}}{2}, & \text{if } S_{i,i+4} \text{ is helix and } \vec{B}_i * \vec{B}_{i+4} > 0.9 \\ -(DF_i * DF_{i+1} + DF_{i+3} * DF_{i+4}), & \text{if } \vec{B}_i * \vec{B}_{i+4} < -0.3 \text{ or } \vec{B}_i * \vec{B}_{i+4} > 0.5 \\ 0, & \text{otherwise} \end{cases} \quad (S23)$$

$$E_{sec}(\vec{C}_i, \vec{C}_{i+2}) = -\frac{DF_i + DF_{i+1} + DF_{i+2}}{2} * \frac{\min(0.71, \vec{C}_i * \vec{C}_{i+2})}{0.71} \quad (S24)$$

$$DF_i = \min \left( \max \left( \frac{2.2 * L^{0.38}}{(x_i - x_c)^2 + (y_i - y_c)^2 + (z_i - z_c)^2}, 0.5 \right), 1 \right) \quad (S25)$$

where  $(x_i, y_i, z_i)$  is the coordinate for the  $C_\alpha$  atom of the  $i$ -th residue.  $(x_0, y_0, z_0)$  is the length of the principal axes of the protein ellipsoid, and  $(x_c, y_c, z_c)$  is the center of the protein ellipsoid.  $2.2 * L^{0.38}$  is the estimated radius of gyration for a protein with length  $L$ .

For the first term, the conditions for forming an  $\alpha$ -helix include:  $d_{i,i+4} < 7.53\text{\AA}$ ,  $4\text{\AA} < d_{i,i+3} < 8\text{\AA}$ ,  $\vec{U}_i * \vec{U}_{i+2} < 0$ ,  $\vec{U}_{i+1} * \vec{U}_{i+3} < 0$ ,  $\vec{U}_i * \vec{U}_{i+3} > 0$ , and the local segment  $S_{i+1,i+3}$  is not predicted to be a sheet. Here,  $\vec{U}_i$  is the unit vector starting from the  $i$ -th  $C_\alpha$  atom and pointing to the  $(i+1)$ -th  $C_\alpha$  atom. The conditions for forming  $\beta$ -sheets include:  $d_{i,i+4} > 11\text{\AA}$ ,  $\arccos \frac{\vec{B}_{i+1} * \vec{B}_{i+3}}{|\vec{B}_{i+1}| * |\vec{B}_{i+3}|} < 45^\circ$ ,  $\arccos \frac{\vec{B}_{i+1} * \vec{B}_{i+2}}{|\vec{B}_{i+1}| * |\vec{B}_{i+2}|} > 135^\circ$ , and the local segment  $S_{i+1,i+3}$  is not predicted to be a helix.  $\vec{B}_{i+1}$  is the hydrogen bond direction of the  $(i+1)$ -th residue, which is equal to  $\frac{\vec{U}_i * \vec{U}_{i+1}}{|\vec{U}_i * \vec{U}_{i+1}|}$ . The second term focuses on the direction of the hydrogen bond  $\vec{B}_i$ , while the third term concerns  $\vec{C}_i$ , which is equal to  $\frac{\vec{U}_{i-1} - \vec{U}_i}{|\vec{U}_{i-1} - \vec{U}_i|}$ .

$w_{sec1}, w_{sec2}, w_{sec3}$  are the weights used to balance each energy term.

**Penalty for crumpling structures.** This potential term imposes a penalty to the irregular crumpled structures.

$$E_{crumpling} = \sum_{i=1}^{L-8} E_{crumpling}(i) \quad (S26)$$

$$E_{crumpling}(i) = \begin{cases} 1, & \text{if } \vec{U}_{i,i+4} \cdot \vec{U}_{i+4,i+8} < 0, \vec{U}_{i+4,i+8} \cdot \vec{U}_{i+8,i+12} < 0 \text{ and } \vec{U}_{i,i+4} \cdot \vec{U}_{i+8,i+12} > 0 \\ 0, & \text{otherwise} \end{cases} \quad (S27)$$

where  $\vec{U}_{i,j}$  is the unit vector starting from the  $i$ -th  $C_\alpha$  atom and pointing to the  $j$ -th  $C_\alpha$  atom.

**Alpha/beta fragment restraints.** This potential encourages the continuous alpha/beta fragments for secondary structures.

$$E_{sec}^{frag} = \sum_{i=1}^L E_{sec}^{frag}(i) \quad (S28)$$

$$E_{sec}^{frag}(i) = \begin{cases} |d_{i,i+7} - 10.5|, & \text{if } S_{i,i+7} \text{ is helix} \\ |d_{i,i+6} - 19.1| * 2, & \text{if } S_{i,i+6} \text{ is sheet} \\ 0, & \text{otherwise} \end{cases} \quad (S29)$$

#### E-Group5: Statistical pairwise potentials

**$C_\alpha$ -SG pairwise potential.** This potential is used for atomic packing and solvation between  $C_\alpha$  atom and side-group heavy atoms.



$$E_{pair}^{C\alpha-SG} = \sum_i^L \sum_{j \neq i}^L E_{pair}^{C\alpha-SG}(d_{ij}^{C\alpha-SG}) \quad (S30)$$

$$E_{pair}^{C\alpha-SG} = \begin{cases} \left( \frac{r_1}{d_{ij}^{C\alpha-SG}} \right)^2 - \frac{1}{2}, & \text{if } r_1 \leq d_{ij}^{C\alpha-SG} < r_2 \\ \frac{1}{2}, & \text{if } d_{ij}^{C\alpha-SG} < r_1 \\ 0, & \text{otherwise} \end{cases} \quad (S31)$$

where  $d_{ij}^{C\alpha-SG}$  is the distance between the  $C_\alpha$  atom of the  $i$ -th residue and the center of the side-group heavy atoms for the  $j$ -th residue.  $r_1=3.14\text{\AA}$  and  $r_2=5.22\text{\AA}$ .

**SG-SG pairwise potential.** This potential is used for atomic packing and solvation between side-group heavy atoms.

$$E_{pair}^{SG} = \sum_i^L \sum_{j \neq i}^L E_{pair}^{SG}(d_{ij}^{SG}) \quad (S32)$$

$$E_{pair}^{SG}(d_{ij}^{SG}) = \begin{cases} U_{i,j}^{ori}, & \text{if } d_{ij}^{SG} < d_{cut}^{SG}(AA_i, AA_j) \\ 0, & \text{otherwise} \end{cases} \quad (S33)$$

where  $d_{ij}^{SG}$  is the distance between the  $i$ -th and  $j$ -th centers of the side-group heavy atoms in the model;  $d_{cut}^{SG}(AA_i, AA_j)$  is an amino acid type-dependent cut-off value for  $d_{ij}^{SG}$ .  $U_{i,j}^{ori}$  is the generic orientation-dependent contact potential derived from 6,500 non-redundant high-resolution PDB structures<sup>31</sup>, and the contacts are weighted by the sum of the BLOSUM<sup>32</sup> mutation score between the residue pairs of the query and the PDB structures over a window of  $\pm 5$  neighboring residues. This potential is query sequence specific but an alignment between the query and the PDB structure is not needed since we count all the contact pairs in the PDB structures that have the same amino acid identity ( $A_i, A_j$ ) to the query, where  $A_i$  and  $A_j$  are the amino acid identities of the residues.

**Parallel  $C_\alpha$ - $C_\alpha$  pairwise potential.** This potential is used for atomic packing and solvation between parallel  $C_\alpha$  atoms.

$$E_P^{C\alpha} = \sum_i^{L-1} \sum_{j>i}^L E_P^{C\alpha}(d_{ij}) \quad (S34)$$

$$E_P^{C\alpha}(d_{ij}) = \begin{cases} \min\left(0, -\frac{r_1^2}{\max(r_1^2, d_{ij}^2)} + \frac{1}{2}\right), & \text{if } \vec{C}_i * \vec{C}_j > 0.5 \\ 0, & \text{otherwise} \end{cases} \quad (S35)$$

Here,  $r_1=4.77\text{\AA}$ .  $\vec{C}_i * \vec{C}_j > 0.5$  indicates that the  $i$ -th  $C_\alpha$  vector,  $\vec{U}_i$ , and the  $j$ -th  $C_\alpha$  vector,  $\vec{U}_j$ , are parallel, where  $\vec{U}_i$  is the unit vector starting from the  $i$ -th  $C_\alpha$  atom and pointing to the  $(i+1)$ -th  $C_\alpha$  atom, and  $\vec{C}_i = \frac{\vec{U}_{i-1} - \vec{U}_i}{|\vec{U}_{i-1} - \vec{U}_i|}$  as shown in **Eq. 18**.

**Non-parallel  $C_\alpha$ - $C_\alpha$  pairwise potential.** This potential is used for atomic packing and solvation between non-parallel  $C_\alpha$  atoms.

$$E_{NP}^{C\alpha} = \sum_i^{L-1} \sum_{j>i}^L E_{NP}^{C\alpha}(d_{ij}) \quad (S36)$$

$$E_{NP}^{C\alpha}(d_{ij}) = \begin{cases} \frac{r_1^2}{d_{ij}^2} - \frac{1}{2}, & \text{if } \vec{C}_i * \vec{C}_j \leq 0.5, d_{ij} < 5\text{\AA} \\ 0, & \text{otherwise} \end{cases} \quad (S37)$$

Here,  $r_1=3.48\text{\AA}$ .  $\vec{C}_i * \vec{C}_j \leq 0.5$  indicates that the  $i$ -th  $C_\alpha$  vector,  $\vec{U}_i$ , and the  $j$ -th  $C_\alpha$  vector,  $\vec{U}_j$ , are not parallel.

## E-Group6: Hydrogen bond restraints

The hydrogen bonds in D-I-TASSER are specified by the backbone geometry following the STRIDE secondary structure assignments.

$$E_{HB} = \sum_{i=1}^{L-1} \sum_{j>i}^L E_{HB}(d_{ij}) \quad (S38)$$

$$E_{HB}(d_{ij}) = \begin{cases} -w_{HB}(1 - |CC - CC_0|)(1 - |BB - BB_0|) \left[ \frac{1}{(1 + |bri - br_0|)} + \frac{1}{(1 + |brj - br_0|)} \right], \\ \quad \text{if helix and } |i - j| = 3 \\ -w_{HB}(|BB| * CC) \left[ \frac{1}{1 + bri/2} + \frac{1}{1 + brj/2} \right], \\ \quad \text{if sheet and } |i - j| < 4 \text{ for parallel or } |i - j| > 20 \text{ for antiparallel} \end{cases} \quad (S39)$$

where  $CC = \vec{C}_i * \vec{C}_j$ ,  $BB = \vec{B}_i * \vec{B}_j$ ,  $bri = |\varepsilon \vec{H}_i - \vec{r}|$  and  $brj = |\varepsilon \vec{H}_j - \vec{r}|$ . Here,  $\varepsilon = 5.0\text{\AA}$  or  $4.6\text{\AA}$  if both donor and receptor residues are predicted as  $\alpha$ -helices or  $\beta$ -sheets. Similarly,  $w_{HB} = 1$  if both donor and receptor residues are predicted as  $\alpha$ -helices and  $\beta$ -sheets; otherwise  $w_{HB} = 0.5$ . The cutoff parameters for standard hydrogen bonds ( $CC_0$ ,  $BB_0$ ,  $br_0$ ) were calculated from an average of 500 high resolution PDB structures with their secondary structure elements assigned by STRIDE<sup>33</sup>.

### E-Group7: Statistical restraints from the PDB library

**Short-range correlation restraints.** This type of potential considers the short-range  $C_\alpha$  distance correlation between residues. It includes three energy terms as follows.

$$\begin{aligned} E_{corr}^{Ca} = & w_{corr1} \sum_{i=1}^{L-2} \text{corr}(AA_i, AA_{i+2}, \text{bin}(d_{i,i+2})) \\ & + w_{corr2} \sum_{i=1}^{L-3} \text{corr}(AA_{i+1}, AA_{i+2}, \text{bin}(d_{i,i+3}), \varepsilon_i, S_{i+1,i+3}) \\ & + w_{corr3} \sum_{i=1}^{L-4} \text{corr}(AA_{i+1}, AA_{i+2}, \text{bin}(d_{i,i+4}), S_{i+1,i+3}) \end{aligned} \quad (S40)$$

The first term  $\text{corr}(AA_i, AA_{i+2}, \text{bin}(d_{i,i+2}))$  is the short-range  $C_\alpha$  distance correlation between the  $i$ -th and the  $(i+2)$ -th residues, which comes from a look-up table.  $d_{i,i+2}$  is the  $C_\alpha$  distance between the  $i$ -th and  $(i+2)$ -th residues of the model.  $\text{bin}(d_{i,i+2})$  indicates that  $d_{i,i+2} < 6.03$  or that  $d_{i,i+2} \geq 6.03$ . The second term  $\text{corr}(AA_{i+1}, AA_{i+2}, \text{bin}(d_{i,i+3}), \varepsilon_i, S_{i+1,i+3})$  is from a look-up table for short-range  $C_\alpha$  distance correlation between the  $i$ -th and the  $(i+3)$ -th residues.  $d_{i,i+3}$  is the  $C_\alpha$  distance between  $i$ -th and  $(i+3)$ -th residues of the model.  $\text{bin}(d_{i,i+3})$  indicates that  $d_{i,i+3} \in (0, 1\text{\AA}], (1\text{\AA}, 2\text{\AA}], \dots, \text{or } (11\text{\AA}, \infty]$ .  $\varepsilon_i$  denotes the local structure chirality of three consecutive  $C_\alpha$ - $C_\alpha$  vectors from the  $i$ -th to  $(i+3)$ -th residue.  $S_{i+1,i+3}$  denotes that the local segment from the  $i$ -th to  $(i+3)$ -th residue is an alpha-helix, beta-sheet or coil. The third term  $\text{corr}(AA_{i+1}, AA_{i+3}, \text{bin}(d_{i,i+4}), S_{i+1,i+3})$  also comes from a look-up table for correlation between the  $i$ -th and the  $(i+4)$ -th residues.  $d_{i,i+4}$  is the  $C_\alpha$  distance between the  $i$ -th and  $(i+4)$ -th residues of the model.  $\text{bin}(d_{i,i+4})$  indicates that  $d_{i,i+4} \in (0, 1\text{\AA}], (1\text{\AA}, 2\text{\AA}], \dots, \text{or } (15\text{\AA}, \infty]$ .  $w_{corr1}$ ,  $w_{corr2}$ ,  $w_{corr3}$  are the weights used to balance each energy term.

**Binary excluded volume restraints.** This potential considers the general excluded volume interactions, which are represented by a smaller hard-sphere potential plus a  $1/r$  type of soft-core potential with a slightly larger range. This mimics the minimal observed cutoff distance in real proteins, and allows a few atoms to approach closer than is normally observed with an accompanying penalty, thereby partly remedying the coarseness of the discrete lattice model.

$$E_{vol}^{SG} = \sum_i^{L-1} \sum_{j>i}^L E_{vol}^{SG}(d_{ij}^{SG}) \quad (S41)$$

$$E_{vol}^{SG}(d_{ij}^{SG}) = \begin{cases} 1, \text{ if } \begin{cases} \vec{C}_i * \vec{C}_j > 0.5 \text{ and } d_{ij}^{SG} \in (d_{min}^{pa}(AA_i, AA_j), d_{max}^{pa}(AA_i, AA_j)) \\ \text{or } \vec{C}_i * \vec{C}_j < -0.5 \text{ and } d_{ij}^{SG} \in (d_{min}^{an}(AA_i, AA_j), d_{max}^{an}(AA_i, AA_j)) \\ \text{or } -0.5 \leq \vec{C}_i * \vec{C}_j \leq 0.5 \text{ and } d_{ij}^{SG} \in (d_{min}^{pe}(AA_i, AA_j), d_{max}^{pe}(AA_i, AA_j)) \end{cases} \\ 0, \text{ otherwise} \end{cases} \quad (S42)$$

where  $d_{ij}^{SG}$  is the distance between the  $i$ -th and  $j$ -th centers of the side-group heavy atoms in the model.  $\vec{C}_i * \vec{C}_j > 0.5$  and  $d_{ij}^{SG} \in (d_{min}^{pa}(AA_i, AA_j), d_{max}^{pa}(AA_i, AA_j))$  indicate that the  $i$ -th  $C_\alpha$  vector,  $\vec{U}_i$ , and the  $j$ -th  $C_\alpha$  vector,  $\vec{U}_j$ , are

parallel.  $\vec{C}_i * \vec{C}_j < -0.5$  and  $d_{ij}^{SG} \in (d_{min}^{an}(AA_i, AA_j), d_{max}^{an}(AA_i, AA_j))$  indicate that the  $i$ -th  $C_\alpha$  vector,  $\vec{U}_i$ , and the  $j$ -th  $C_\alpha$  vector,  $\vec{U}_j$ , are antiparallel.  $\vec{C}_i * \vec{C}_j < -0.5$  and  $d_{ij}^{SG} \in (d_{min}^{pe}(AA_i, AA_j), d_{max}^{pe}(AA_i, AA_j))$  indicate that the  $i$ -th  $C_\alpha$  vector,  $\vec{U}_i$ , and the  $j$ -th  $C_\alpha$  vector,  $\vec{U}_j$ , are perpendicular.  $(d_{min}^{pa}(AA_i, AA_j), d_{max}^{pa}(AA_i, AA_j))$ ,  $(d_{min}^{an}(AA_i, AA_j), d_{max}^{an}(AA_i, AA_j))$  and  $(d_{min}^{pe}(AA_i, AA_j), d_{max}^{pe}(AA_i, AA_j))$ , which correspond to parallel/antiparallel/perpendicular  $C_\alpha$  vectors, are amino acid type-dependent statistical values that were extracted from the PDB.

**Statistical excluded volume restraints.** This potential is the upgrade version of excluded volume restraints.

$$E_{mvol}^{SG} = \sum_{i=1}^{L-1} \sum_{j>i}^L E_{mvol}^{SG}(d_{ij}^{SG}) \quad (S43)$$

$$E_{mvol}^{SG}(d_{ij}^{SG}) = \begin{cases} U^{pa}(AA_i, AA_j), & \text{if } \vec{C}_i * \vec{C}_j > 0.5 \text{ and } d_{ij}^{SG} \in (d_{min}^{pa}(AA_i, AA_j), d_{max}^{pa}(AA_i, AA_j)) \\ U^{an}(AA_i, AA_j), & \text{if } \vec{C}_i * \vec{C}_j < -0.5 \text{ and } d_{ij}^{SG} \in (d_{min}^{an}(AA_i, AA_j), d_{max}^{an}(AA_i, AA_j)) \\ U^{pe}(AA_i, AA_j), & \text{if } -0.5 \leq \vec{C}_i * \vec{C}_j \leq 0.5 \text{ and } d_{ij}^{SG} \in (d_{min}^{pe}(AA_i, AA_j), d_{max}^{pe}(AA_i, AA_j)) \\ 0, & \text{otherwise} \end{cases} \quad (S44)$$

where  $U^{pa}(AA_i, AA_j)$ ,  $U^{an}(AA_i, AA_j)$ , and  $U^{pe}(AA_i, AA_j)$ , which correspond to parallel/antiparallel/perpendicular, are amino acid type-dependent statistical values that were extracted from the PDB.

**Separated  $C_\alpha$ - $C_\alpha$  pairwise potential.** This potential considers the  $C_\alpha$  distance between separated residues.

$$E_{Spair1-5}^{C\alpha} = \sum_{i=3}^{L-3} \sum_{j>i}^{L-1} E_{Spair1-5}^{C\alpha}(d_{ij}) \quad (S45)$$

$$E_{Spair1-5}^{C\alpha}(d_{ij}) = \begin{cases} -corr(AA_{i-1}, AA_{i+1}, bin(d_{i-2,i+2}), S_{i-1,i+1}) \\ \quad * corr(AA_{j-1}, AA_{j+1}, bin(d_{j-2,j+2}), S_{j-1,j+1}), \\ \quad \text{if } \begin{cases} \vec{C}_i * \vec{C}_j > 0.5 \text{ and } d_{ij}^{SG} \in (0, d_{max}^{pa}(AA_i, AA_j)) \\ \text{or } \vec{C}_i * \vec{C}_j < -0.5 \text{ and } d_{ij}^{SG} \in (0, d_{max}^{an}(AA_i, AA_j)) \\ \text{or } -0.5 \leq \vec{C}_i * \vec{C}_j \leq 0.5 \text{ and } d_{ij}^{SG} \in (0, d_{max}^{pe}(AA_i, AA_j)) \end{cases} \\ 0, & \text{otherwise} \end{cases} \quad (S46)$$

where  $d_{ij}$  is the  $C_\alpha$  distance between the  $i$ -th and  $j$ -th residues of the model;  $d_{ij}^{SG}$  is the distance between the  $i$ -th and  $j$ -th centers of the side-group heavy atoms in the model.  $corr(AA_{i-1}, AA_{i+1}, bin(d_{i-2,i+2}), S_{i-1,i+1})$  is similar to the description in Eq. S40.

**Contact profile constraints.** The potential describes the contact environment.

$$E_{cprof} = \sum_{i=1}^L E_{cprof}(N_i^{pa}, N_i^{an}, N_i^{pe}, AA_i) \quad (S47)$$

where  $N_i^{pa}$ ,  $N_i^{an}$ ,  $N_i^{pe}$  are the number of residues that are in parallel/antiparallel/perpendicular contact with the  $i$ -th residue.  $E_{cprof}(N_i^{pa}, N_i^{an}, N_i^{pe}, AA_i)$  is the statistic value from the PDB and calculated using the negative logarithm of the relative frequency histogram.

**Contact number constraints.** This potential accounts for the biases to the expected contact order and contact number.

$$E_{Ncon} = |N^{Con} - N_0^{Con}| + |\overline{S^{Con}} - S_0^{Con}| \quad (S48)$$

where  $N^{Con}$  is the number of contacts in a decoy structure and  $\overline{S^{Con}}$  is the average sequence separation of the contacts.  $N_0^{Con}$  and  $S_0^{Con}$  are statistical values extracted from the PDB, which are a linear function of  $\alpha * L$ , where  $L$  is the protein length and  $\alpha$  is 1.5.

## Supplementary Figures

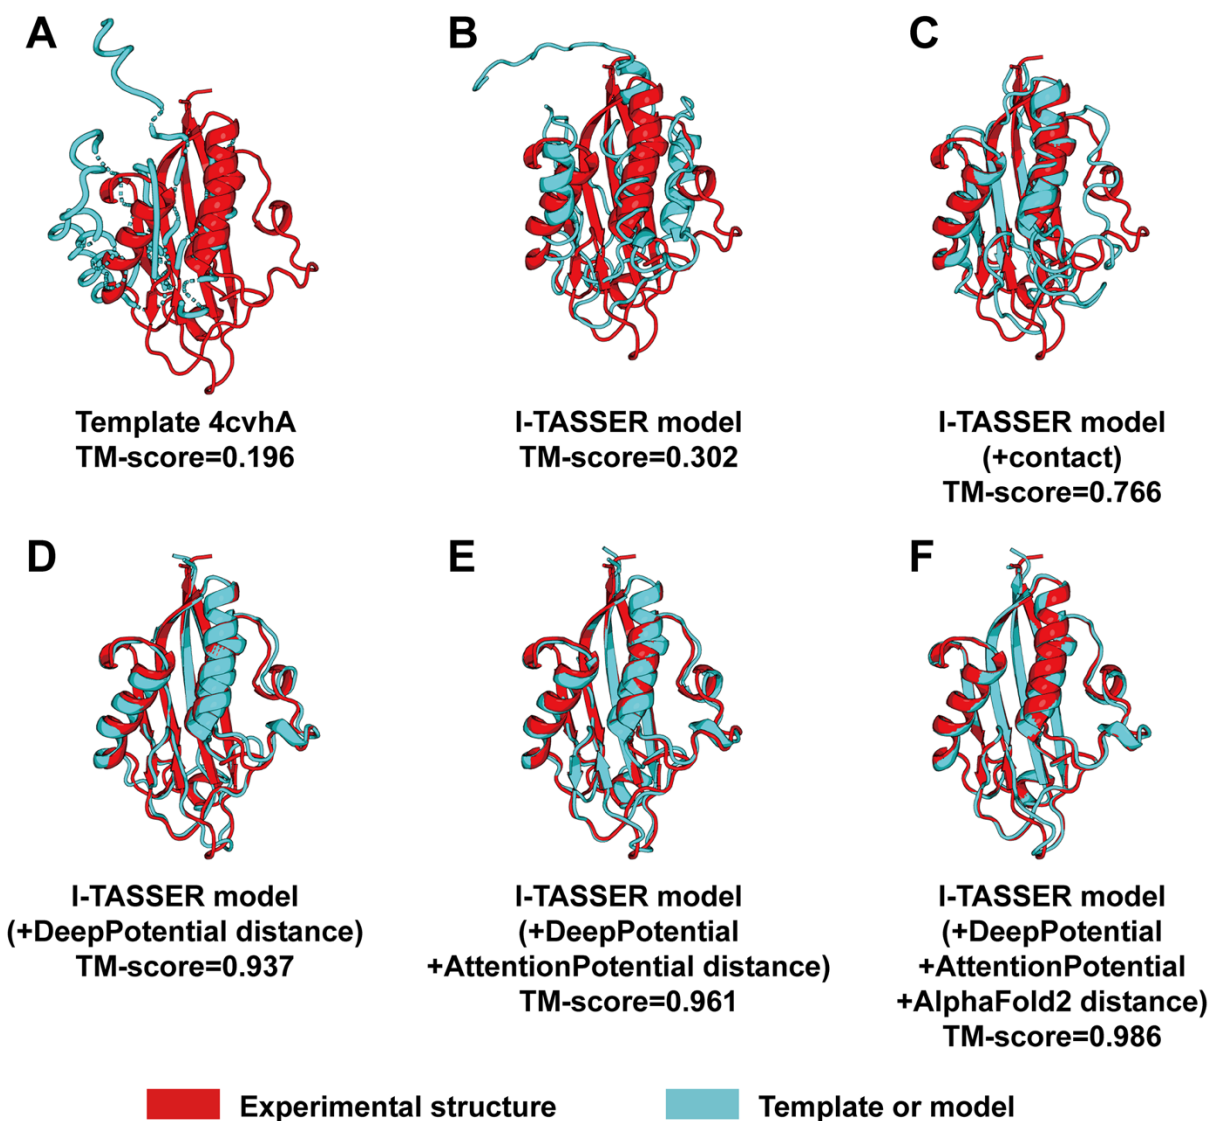

**Fig. S1.** Structural modeling of 2-C-methyl-D-erythritol 2,4-cyclodiphosphate synthase (PDB ID: 3fpiA) using various I-TASSER workflows. The images are shown for the superposition of the experimental structure (red) with predicted models by (A) the best LOMETS template (PDB ID: 4cvhA); (B) I-TASSER without using deep-learning restraints; (C) I-TASSER with contact-map prediction (C-I-TASSER); (D) I-TASSER with distance map by DeepPotential; (E) I-TASSER with distance maps by DeepPotential and AttentionPotential; (F) I-TASSER with distance maps by DeepPotential, AttentionPotential and AlphaFold2.

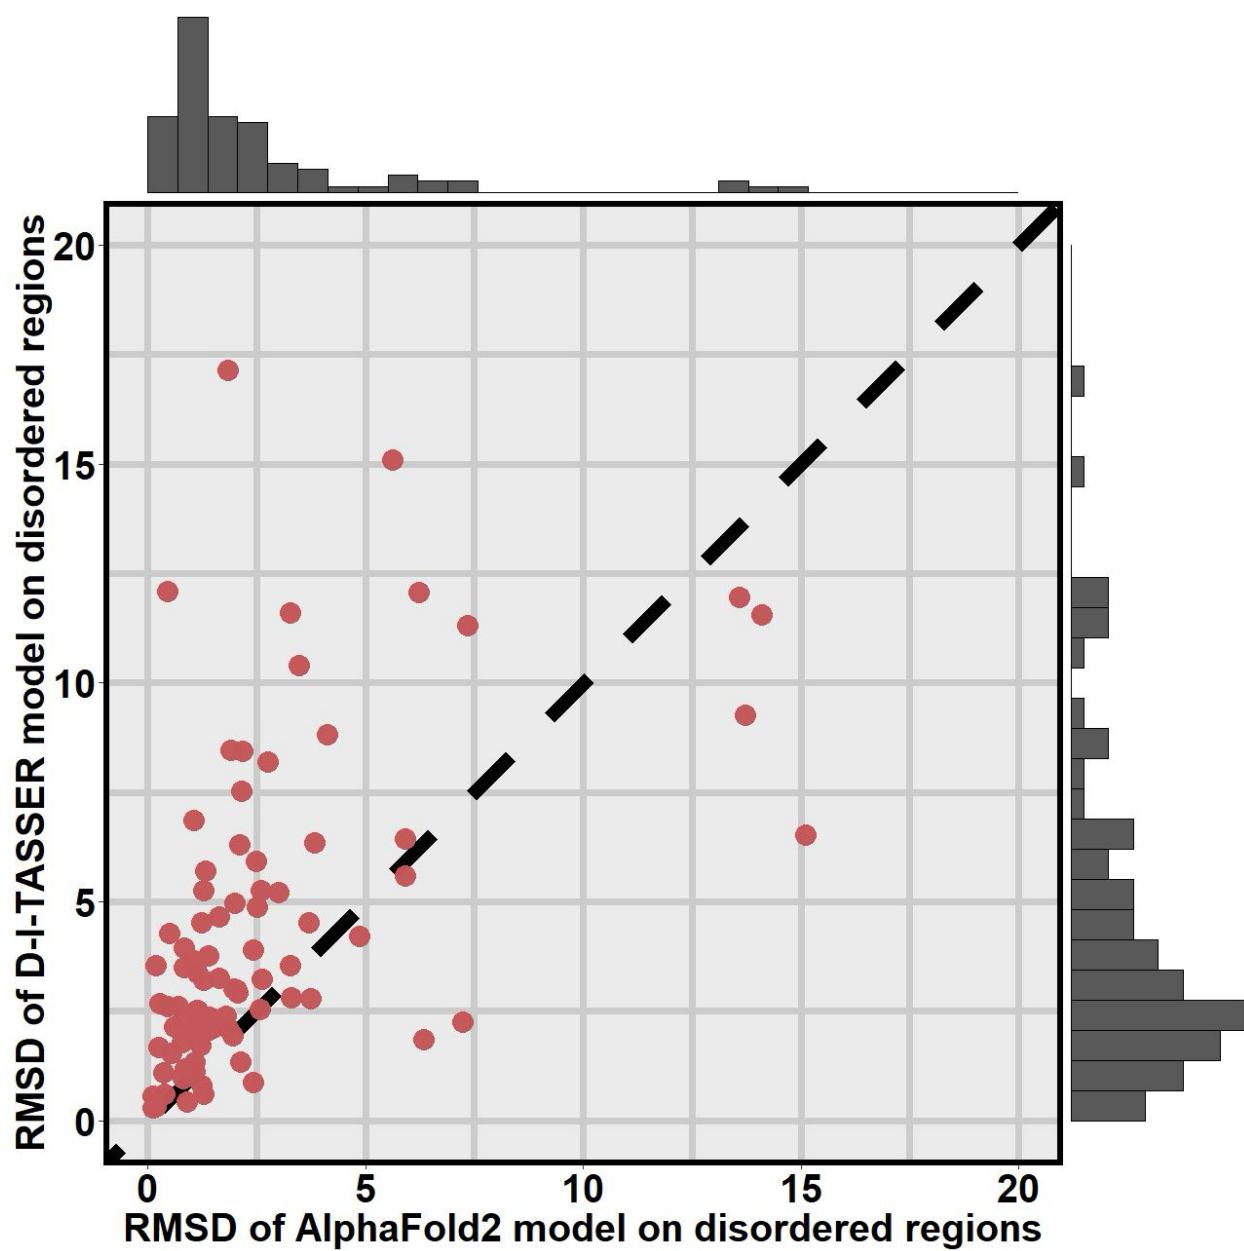

**Fig. S2.** The average RMSDs between the top five models generated by D-I-TASSER and those by AlphaFold2 for 91 disordered regions lacking experimentally determined structures on the *Benchmark-I* dataset of 1,262 proteins.

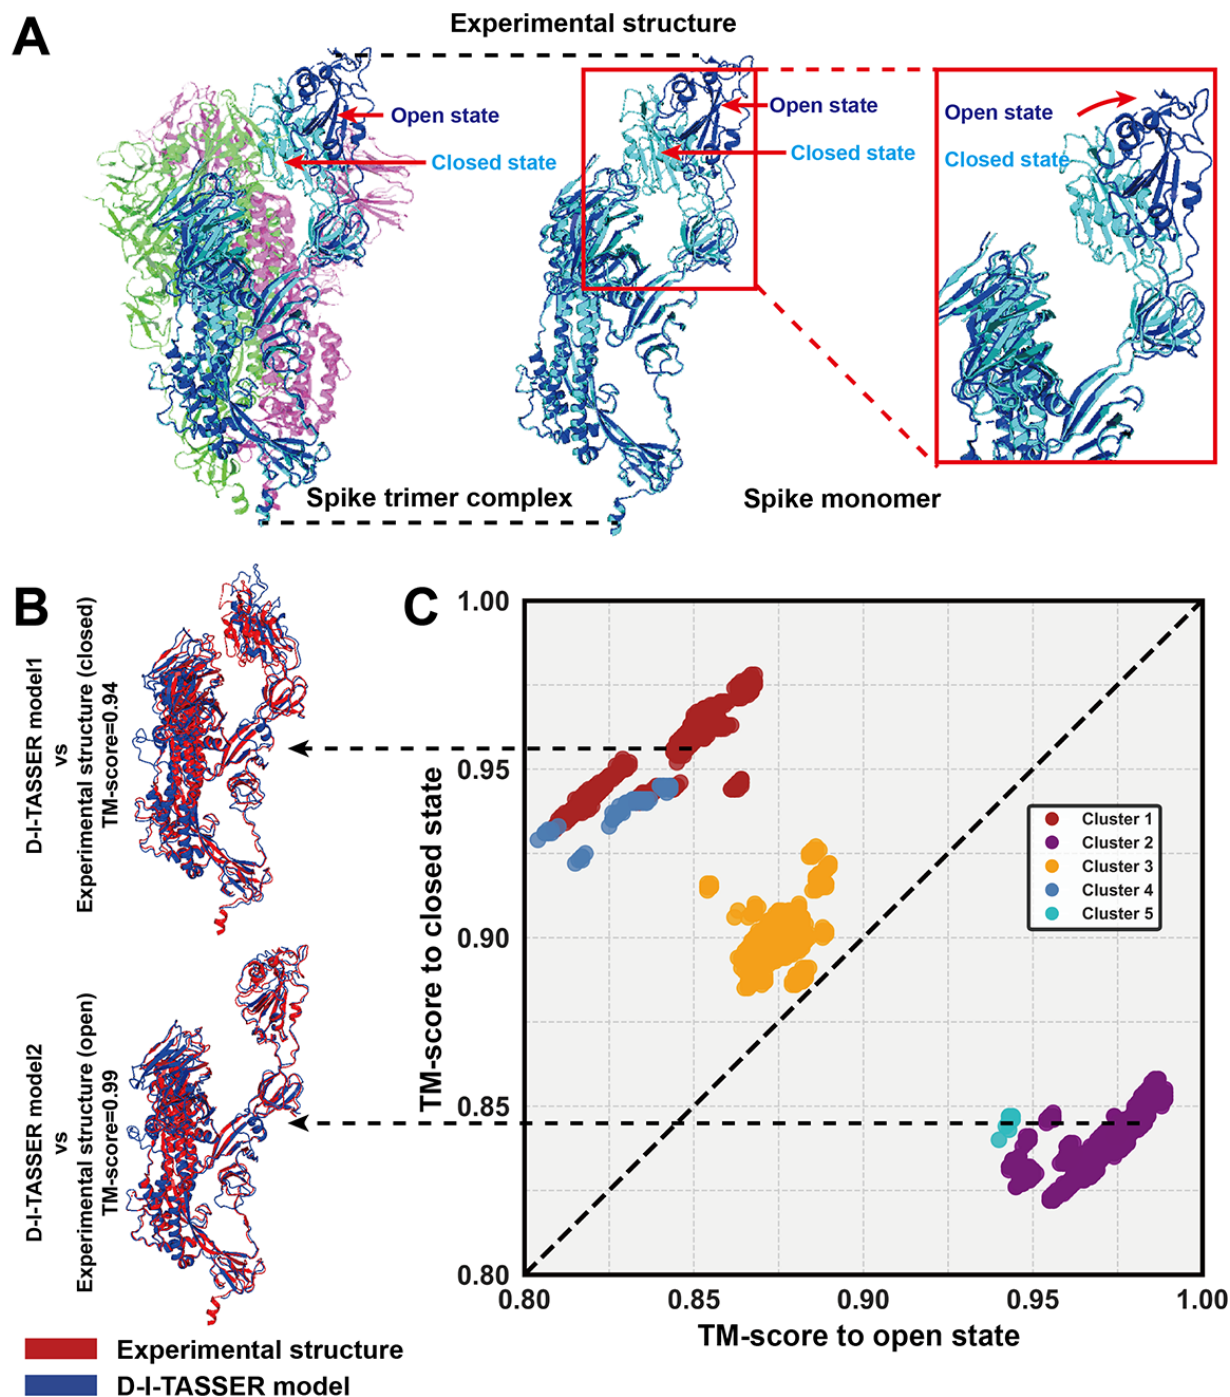

**Fig. S3.** Application of D-I-TASSER to multi-state modeling of the SARS-CoV-2 Spike protein. (A) Open and closed states of the experimental structure for the SARS-CoV-2 Spike protein. (B) Open and closed states of the D-I-TASSER models superposed with experimental structures for the SARS-CoV-2 Spike protein. (C) Head-to-head comparison between TM-scores of open and closed states of the 4,362 D-I-TASSER models for the SARS-CoV-2 Spike protein. Notably, the structure members of cluster1 and cluster2 are more similar, resulting in a higher degree of point overlap, which makes cluster1 and cluster2 appear relatively "smaller" than cluster3.

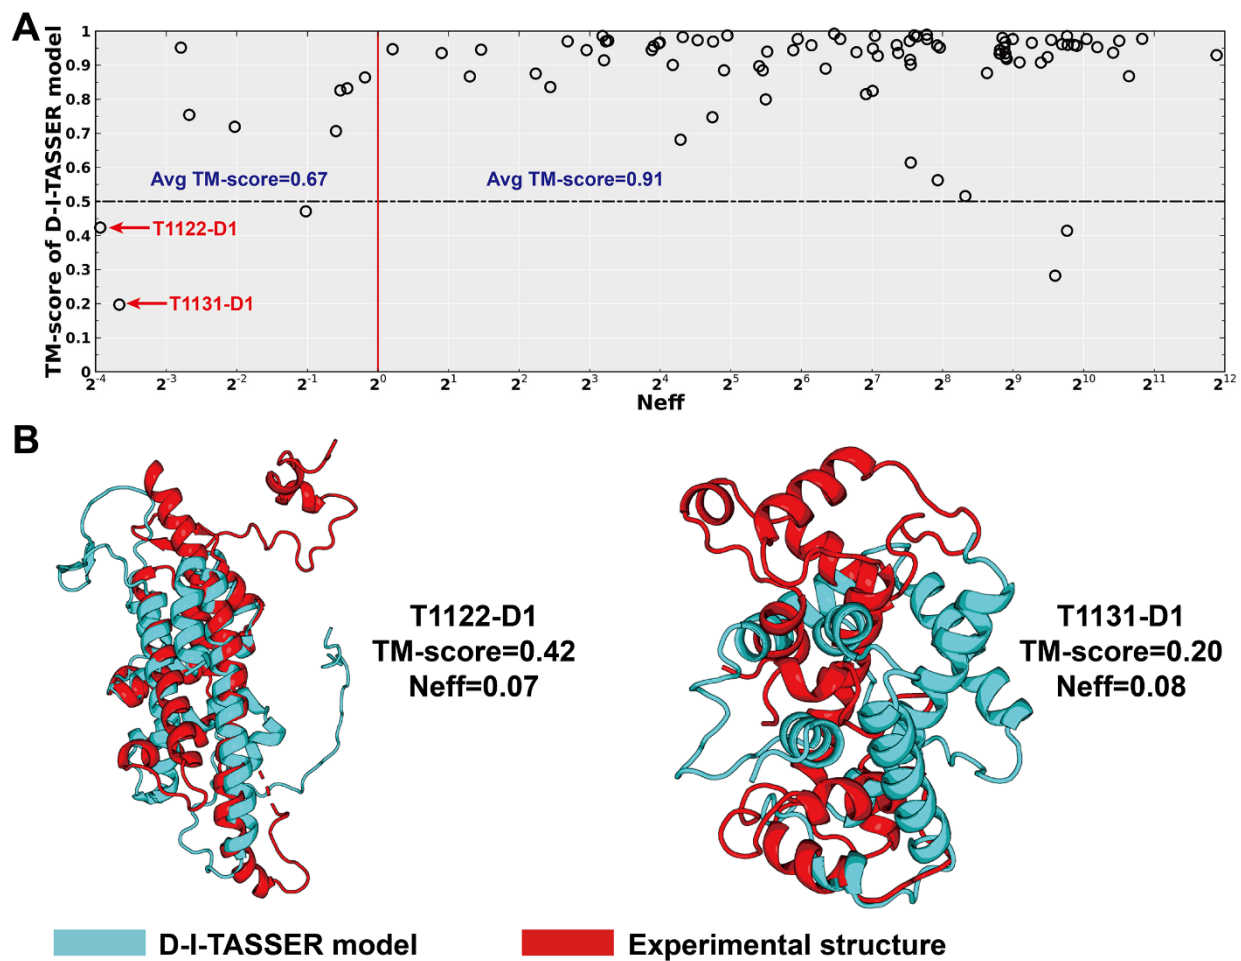

**Fig. S4.** The relationship between *Neff* and TM-score of D-I-TASSER models on CASP15 targets. (A) *Neff* versus TM-score of D-I-TASSER models on 94 CASP15 targets. (B) Two examples of orphan proteins for targets T1122-D1 and T1131-D1 for which poor modeling performance was observed due to low-information MSAs.

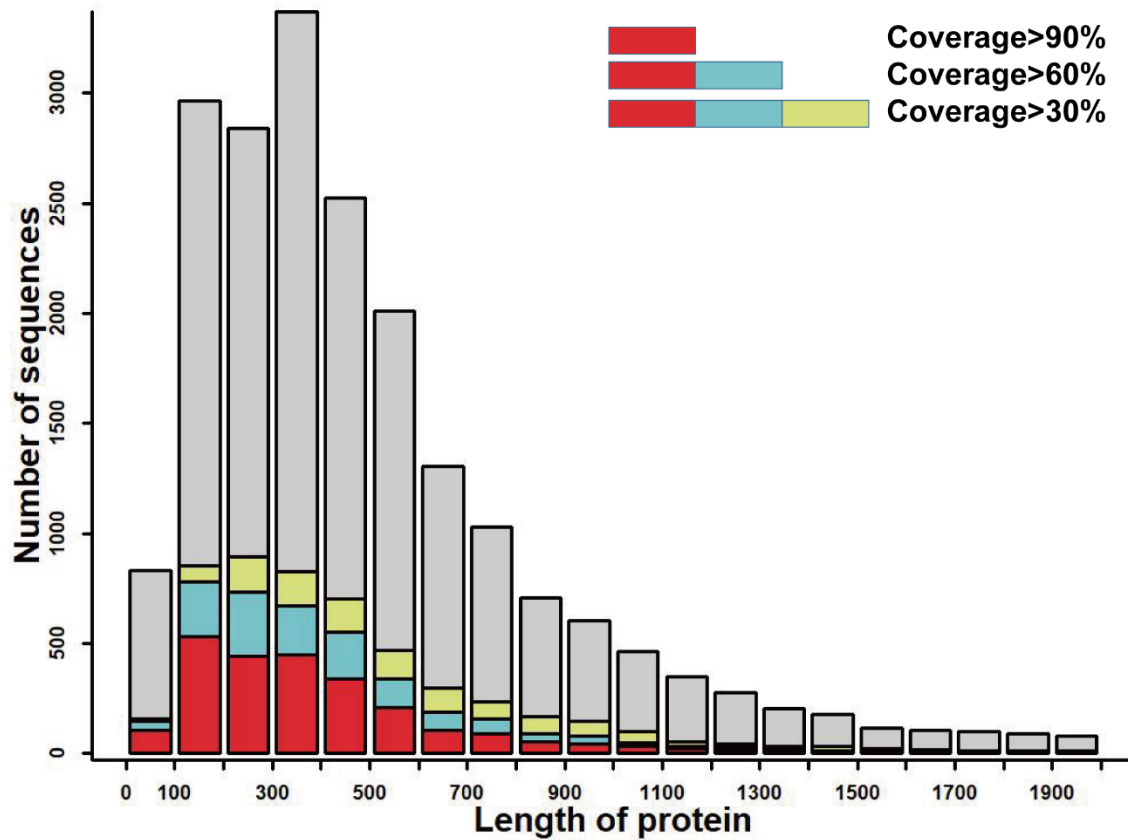

**Fig. S5.** Summary of the protein lengths and experimental structure coverage for the human proteome dataset of 20,596 proteins. The red bars represent the number of sequences with >90% coverage by known structures; the cyan bars correspond to the >60% and  $\leq 90\%$  coverage; the yellow bars are for >30% and  $\leq 60\%$  coverage.



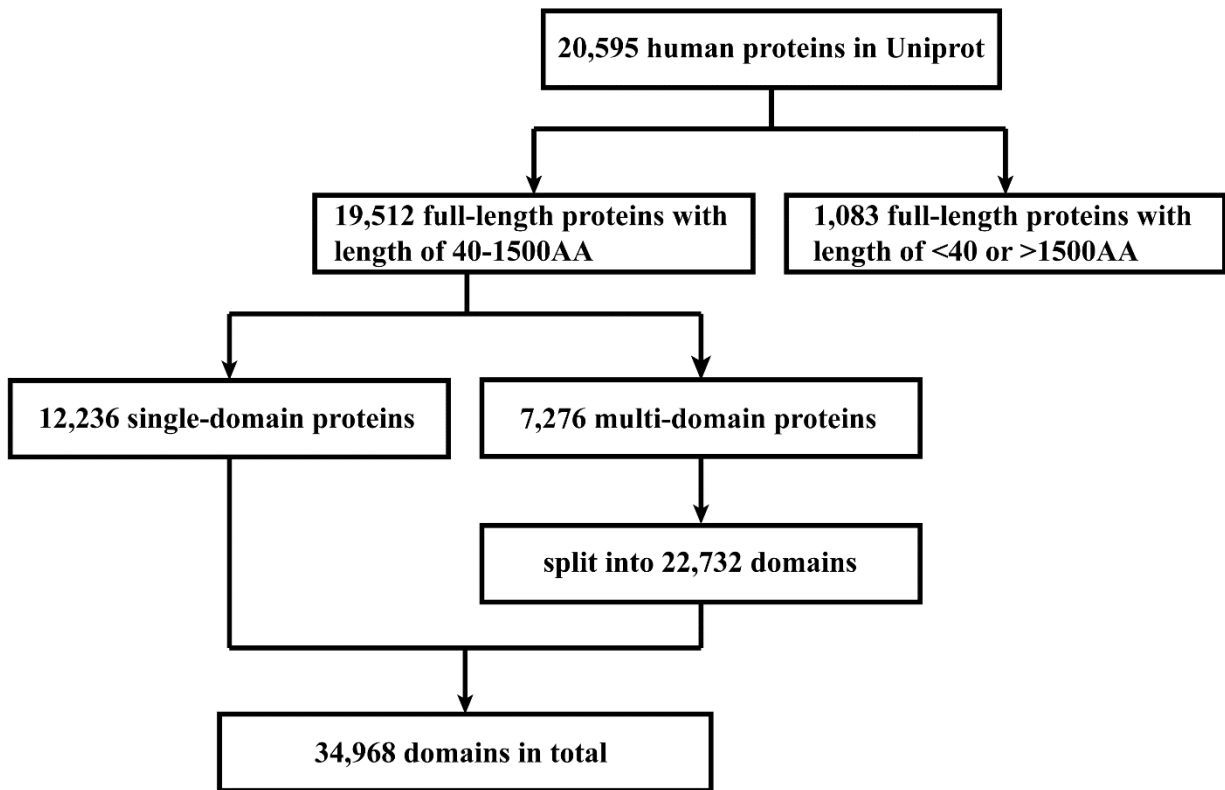

**Fig. S6.** Number of human proteins at each stage of the analysis, where each set is a subset of the previous set.

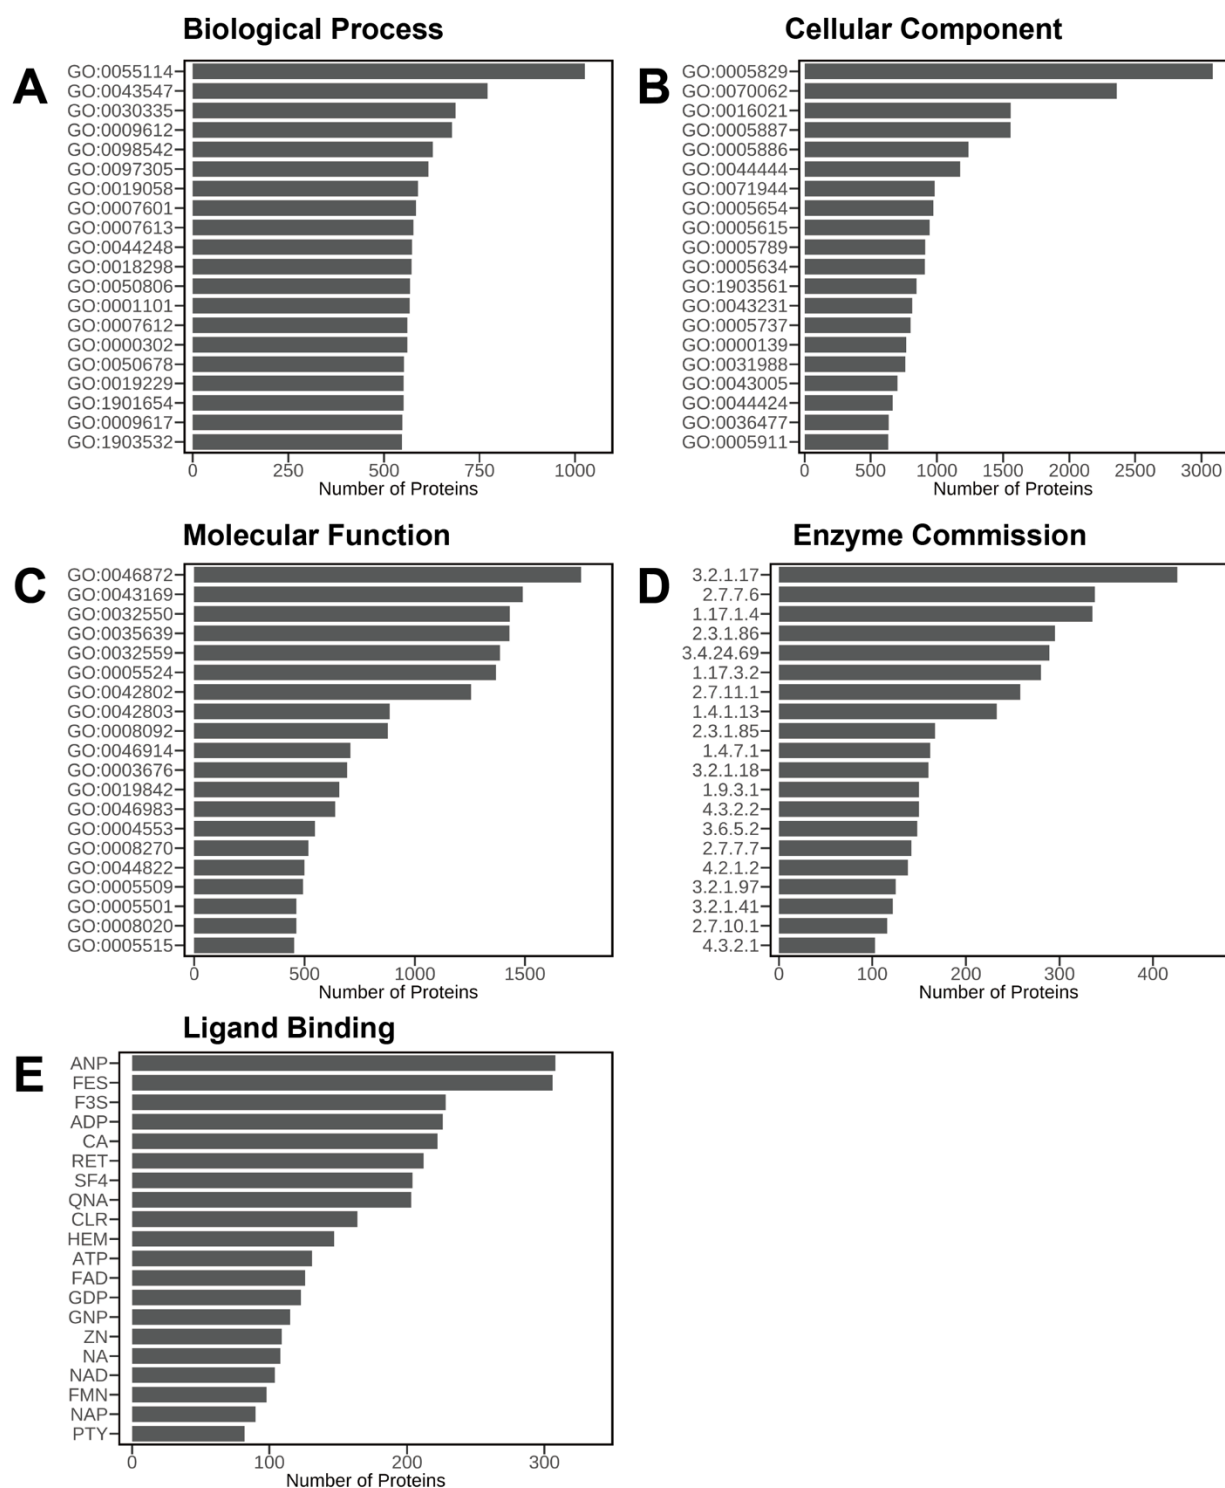

**Fig. S7.** Frequency analysis of the most commonly predicted functions for 19,512 proteins in the human proteome arising from our pipeline. The number of proteins on top 20 BP GO terms (A), CC GO terms (B), MF GO terms (C), EC terms (D) and non-peptide ligands (E).

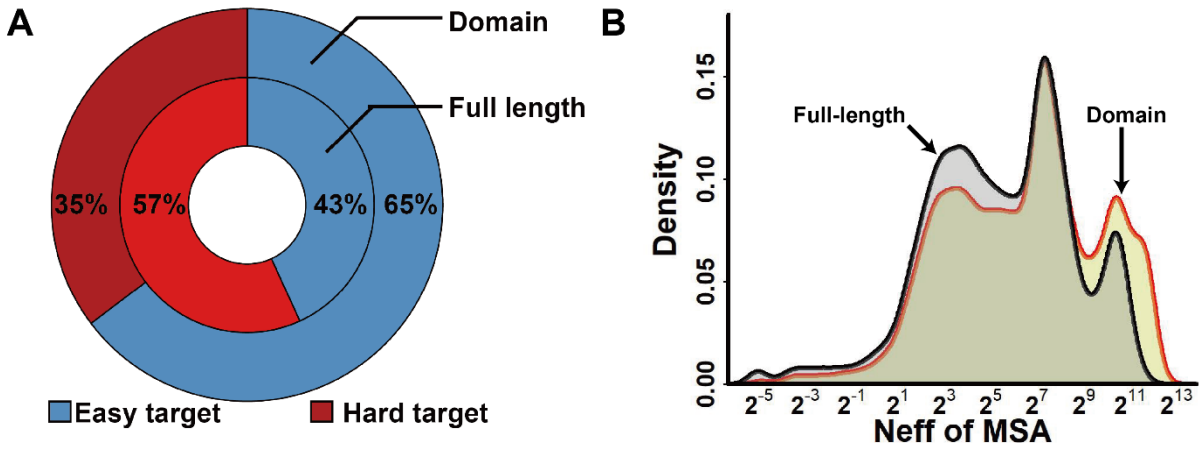

**Fig. S8.** Statistics on human proteome dataset of 19,512 proteins. (A) The ratio of Easy and Hard targets for the domain-level and full-chain human proteins. (B) MSA *Neff* value distribution for domain-level and full-chain human proteins.

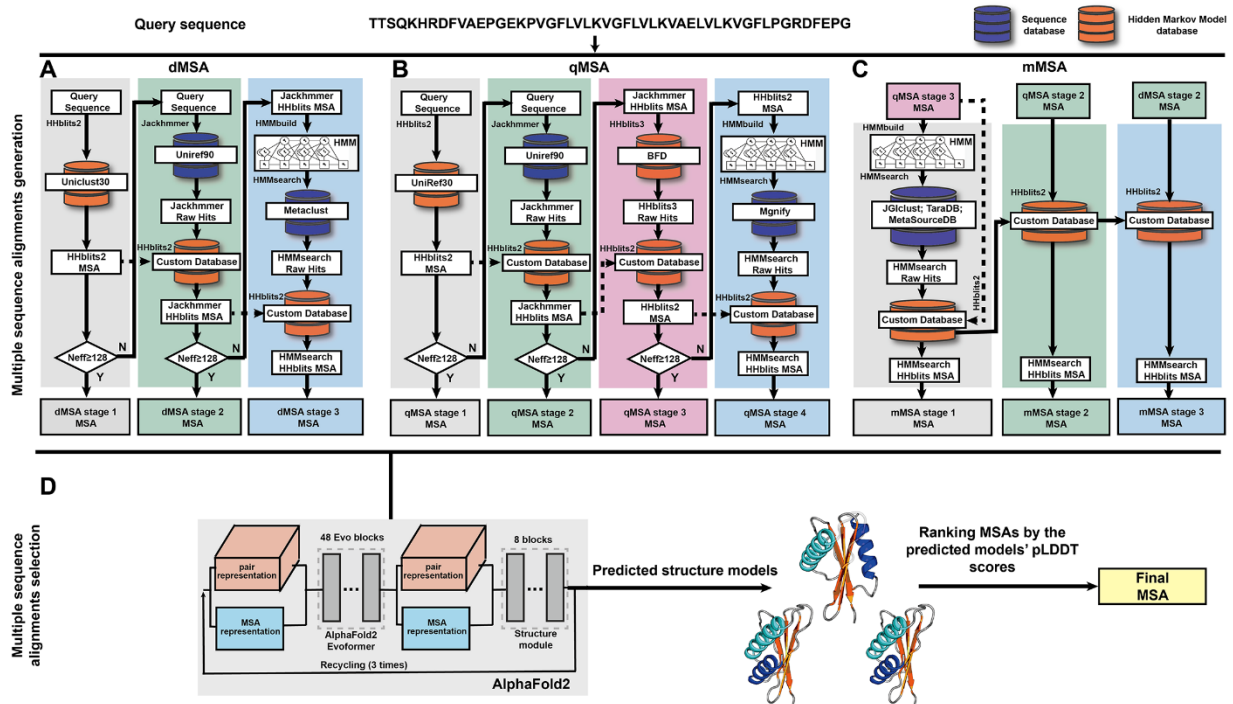

**Fig. S9.** Schematic of the DeepMSA2 pipeline, which contains four approaches, (A) dMSA, (B) qMSA, (C) mMSA and (D) MSA selection.

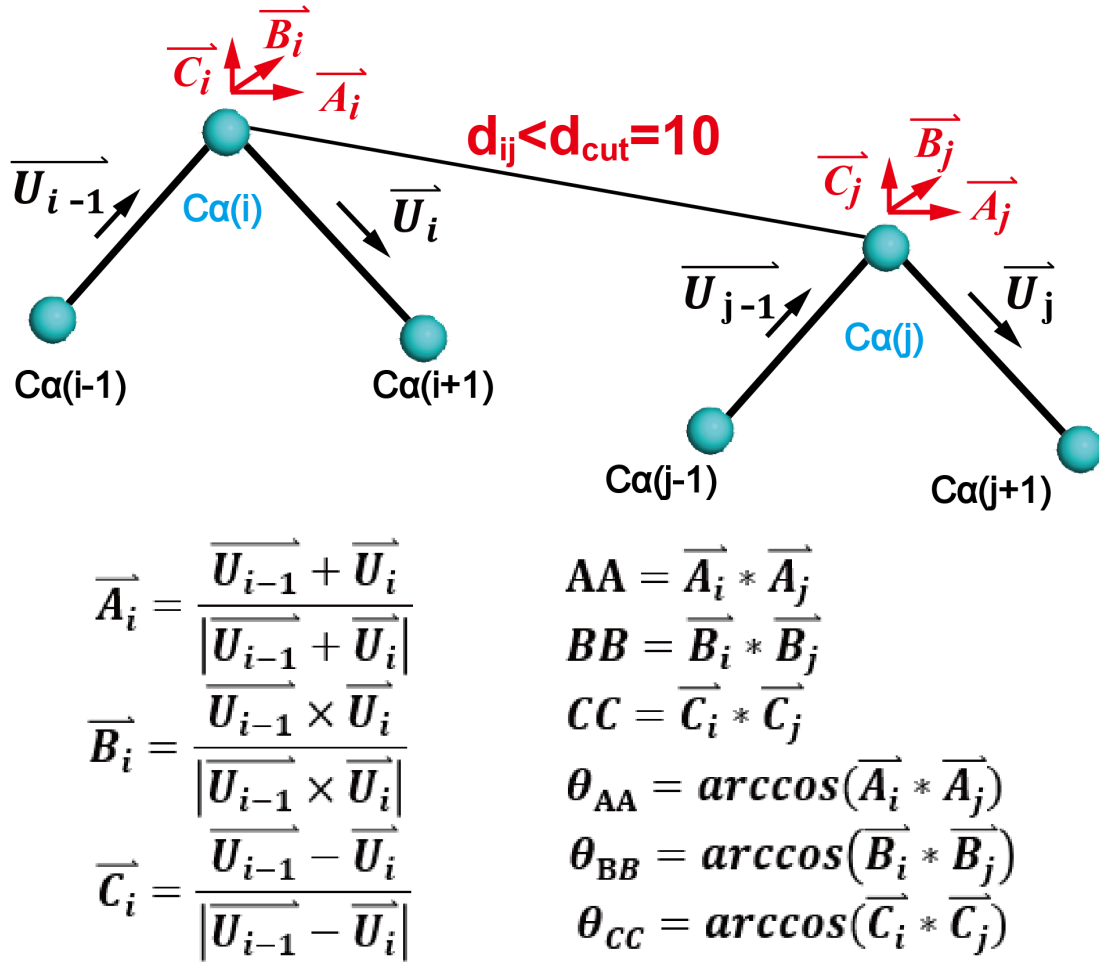

Fig. S10. Definition of hydrogen bonds used by D-I-TASSER.

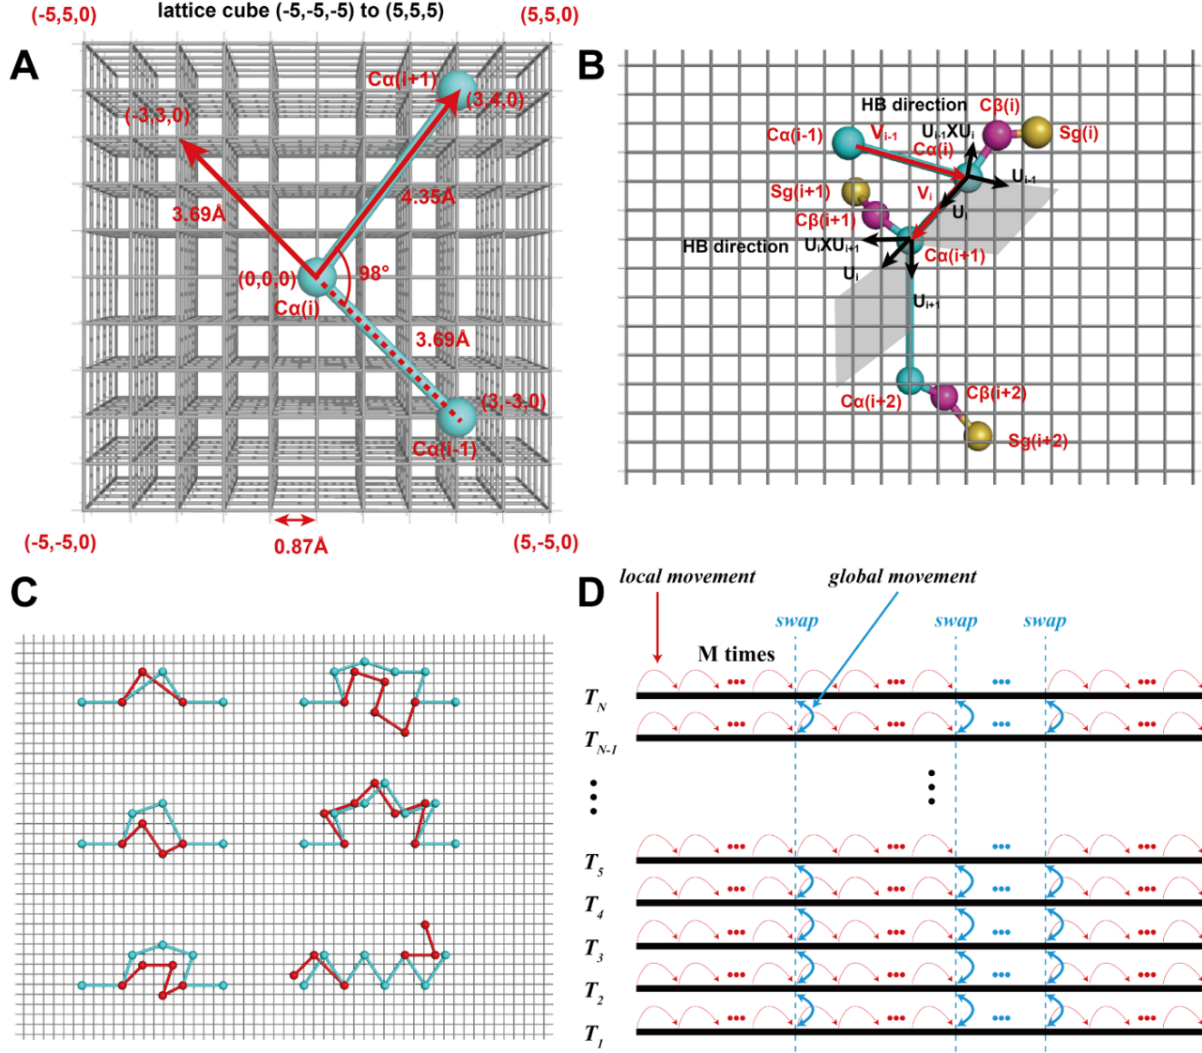

**Fig. S11.** Schematics of the modeling and simulation settings in D-I-TASSER. **(A)** Reduced representation of an amino acid using a three-dimensional underlying cubic lattice system with a lattice grid of 0.87 Å. Only the alpha carbon ( $C_\alpha$ ) atom of each residue is treated explicitly. Considering the  $C_\alpha$  of the  $i$ -th residue,  $C_\alpha(i)$ , the lattice cube is from  $(-5,-5,-5)$  to  $(5,5,5)$ .  $C_\alpha(i)$  is located at  $(0,0,0)$ . The  $C_\alpha$  of the previous  $(i-1)$ -th residue,  $C_\alpha(i-1)$  is located at  $(3,-3,0)$  and the  $C_\alpha$ - $C_\alpha$  bond length between  $C_\alpha(i-1)$  and  $C_\alpha(i)$  is 3.69 Å. The  $C_\alpha$  of the next  $(i+1)$ -th residue,  $C_\alpha(i+1)$ , is located at  $(3,4,0)$  and the  $C_\alpha$ - $C_\alpha$  bond length between  $C_\alpha(i+1)$  and  $C_\alpha(i)$  is 4.35 Å. Additionally, the  $C_\alpha$ - $C_\alpha$  bond angle is 98°. **(B)** Determination of the positions for the  $C_\beta$  atom and the center of the side-group heavy atoms. The positions of three consecutive  $C_\alpha$  atoms are used to define a local coordinate system for the determination of the beta carbon ( $C_\beta$ ) (except glycine), and the center of the side-group heavy atoms (SG) (except glycine and alanine).  $\overline{V_{i-1}}$  is the vector from  $C_\alpha(i-1)$  to  $C_\alpha(i)$ , and  $\overline{U_{i-1}}$  is the unit vector for  $\overline{V_{i-1}}$ . The cross product of  $\overline{U_{i-1}}$  and  $\overline{U_i}$ ,  $\overline{U_{i-1}} \times \overline{U_i}$ , is the direction of the hydrogen bond (HB). **(C)** Conformational movements in the D-I-TASSER Monte Carlo simulations. The cyan and red lines are the  $C_\alpha$  traces before and after the movements, respectively. There are 6 types of conformational movements in the D-I-TASSER simulations: (1) 2-bond vector walk; (2) 3-bond vector walk; (3) 4-bond vector walk; (4) 5-bond vector walk; (5) 6-bond vector walk; (6) N- or C-terminal random walk. **(D)** Illustration of the local and global movements used during the REMC simulations. There are  $N$  replicas, which are implemented in parallel. After every  $200 \times L$  local conformational movements, where  $L$  is the protein length, a global swap movement between each pair of neighboring replicas is attempted following the standard Metropolis criterion.

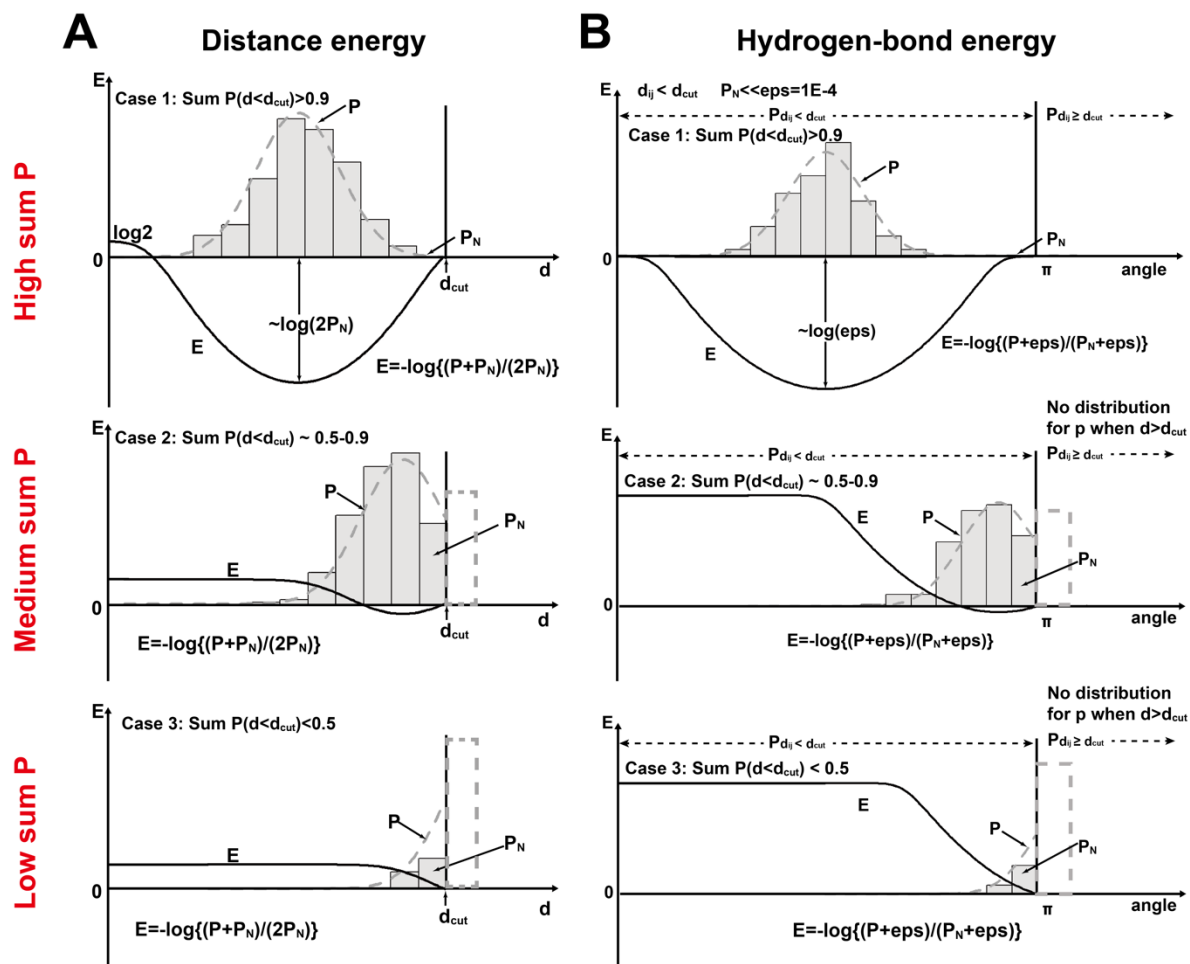

Fig. S12. Illustrations of (A) distance and (B) hydrogen bond potentials for three different situations.

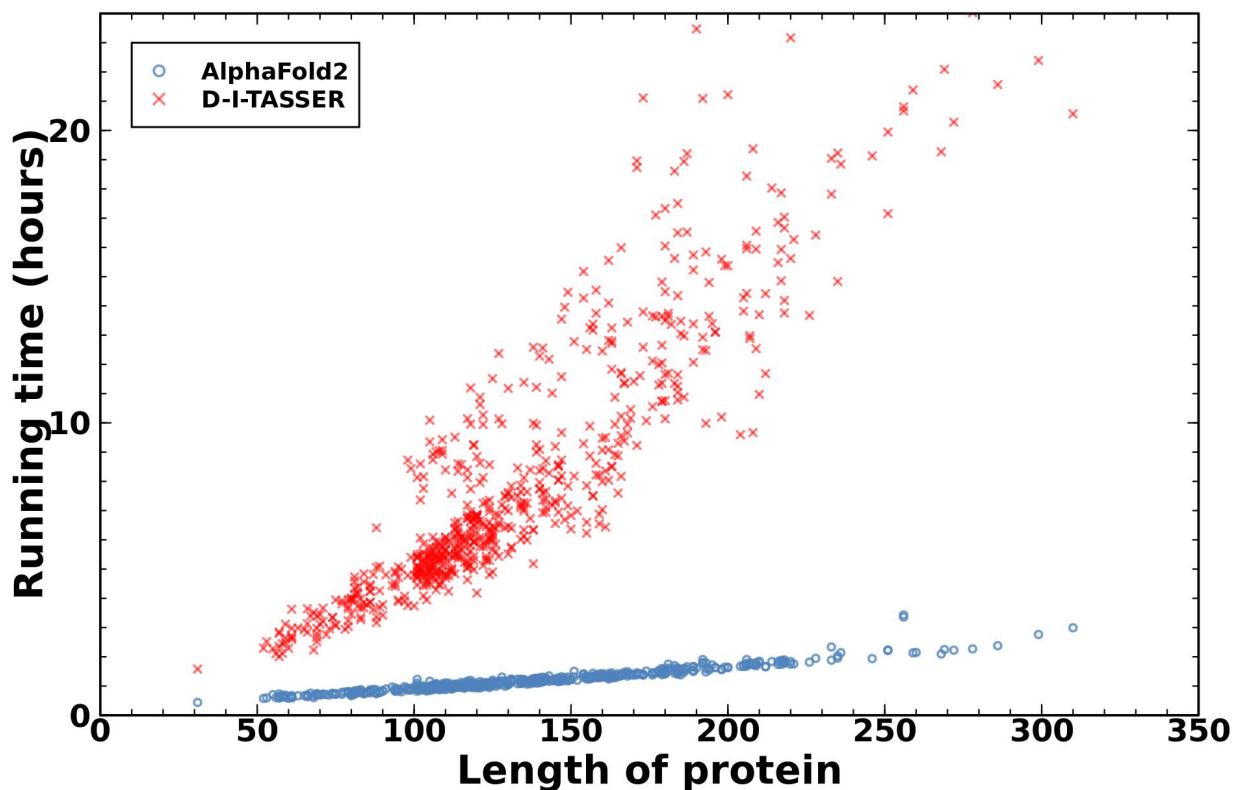

**Fig. S13.** Comparison of time requirements for D-I-TASSER and AlphaFold2 on different size proteins on a dataset of 645 proteins. Both programs were run using 10 CPUs with parallel processing, generating 5 models each. The AlphaFold2 program was executed with default settings, including 1 ensemble, full\_dbs and monomer pipeline as implemented in AlphaFold version 2.2.0. The running time reported excludes the DeepMSA2 search time, as the speed of large database searches is largely influenced by I/O performance. For instance, storing databases on SSD or NVMe drives can significantly reduce search time.



## Supplementary Tables

**Table S1.** Comparison of modeling results by D-I-TASSER with other methods for different target types on the 1,262 benchmark dataset (Benchmark-I). *P*-values were calculated between TM-scores by D-I-TASSER and others using paired one-sided Student's *t*-tests.  $\#\{\text{TM-score} > 0.5\}$  is the number of targets with a TM-score  $> 0.5$ . Here, AlphaFold2 refers to version both 2.2 and 2.3.

| Method                              | Type        | TM-score | <i>P</i> -value | $\#\{\text{TM-score} > 0.5\}$ |
|-------------------------------------|-------------|----------|-----------------|-------------------------------|
| <b>D-I-TASSER</b>                   | All (1,262) | 0.9097   | -               | 1239                          |
|                                     | Easy (762)  | 0.9359   | -               | 759                           |
|                                     | Hard (500)  | 0.8698   | -               | 480                           |
| <b>I-TASSER</b>                     | All (1,262) | 0.6062   | 1.73E-206       | 858                           |
|                                     | Easy (762)  | 0.7290   | 6.87E-125       | 713                           |
|                                     | Hard (500)  | 0.4191   | 9.66E-84        | 145                           |
| <b>C-I-TASSER</b>                   | All (1,262) | 0.6852   | 9.07E-207       | 1066                          |
|                                     | Easy (762)  | 0.7615   | 3.34E-125       | 737                           |
|                                     | Hard (500)  | 0.5688   | 9.83E-84        | 329                           |
| <b>AlphaFold2<br/>(version 2.2)</b> | All (1,262) | 0.8814   | 1.52E-137       | 1213                          |
|                                     | Easy (762)  | 0.9227   | 9.79E-78        | 757                           |
|                                     | Hard (500)  | 0.8185   | 1.11E-61        | 456                           |
| <b>AlphaFold2<br/>(version 2.3)</b> | All (1,262) | 0.8869   | 1.15E-117       | 1218                          |
|                                     | Easy (762)  | 0.9252   | 9.01E-76        | 760                           |
|                                     | Hard (500)  | 0.8286   | 9.25E-46        | 458                           |
| <b>AlphaFold2<br/>+DeepMSA2</b>     | All (1,262) | 0.8937   | 2.12E-121       | 1228                          |
|                                     | Easy (762)  | 0.9281   | 2.94E-66        | 759                           |
|                                     | Hard (500)  | 0.8413   | 2.89E-56        | 469                           |

**Table S2.** The contributions of different spatial restraints used in I-TASSER folding simulations to the final modeling results, compared with different versions of AlphaFold (including AlphaFold3, AlphaFold2.3, AlphaFold2.2, AlphaFold2.1, and AlphaFold2.0) for all 500 Hard targets in our benchmark dataset (Benchmark-I). *P*-values were calculated between TM-scores by D-I-TASSER and others using paired one-sided Student’s *t*-tests.  $\#\{\text{TM-score} > 0.5\}$  is the number of targets with a TM-score  $> 0.5$ . Here, “I-TASSER+contact” indicates the standard I-TASSER method with contact potential used in folding simulation; “I-TASSER+DeepPotential distance+DeepMSA2” means standard I-TASSER method with DeepPotential distance restraints used in folding simulation in combination with DeepMSA2 for MSA generation; “I-TASSER+DeepPotential+AttentionPotential distance+DeepMSA2” means standard I-TASSER method with DeepPotential and AttentionPotential distance restraints used in folding simulation in combination with DeepMSA2 for MSA generation; “I-TASSER+ AlphaFold2 distance+DeepMSA2” means standard I-TASSER method with AlphaFold2 distance restraints used in folding simulation in combination with DeepMSA2 for MSA generation; “D-I-TASSER - DeepMSA2” means default D-I-TASSER method without using DeepMSA2 for MSA generation; “D-I-TASSER - pLDDT MSA ranking” means default D-I-TASSER method without pLDDT MSA ranking step.

| Method                                                                  | TM-score | <i>P</i> -value | $\#\{\text{TM-score} > 0.5\}$ |
|-------------------------------------------------------------------------|----------|-----------------|-------------------------------|
| <b>D-I-TASSER</b>                                                       | 0.8698   | -               | 480                           |
| <b>I-TASSER</b>                                                         | 0.4191   | 9.66E-84        | 145                           |
| <b>I-TASSER<br/>+contact</b>                                            | 0.5688   | 9.83E-84        | 329                           |
| <b>I-TASSER<br/>+DeepPotential distance+DeepMSA2</b>                    | 0.6731   | 4.91E-82        | 393                           |
| <b>I-TASSER<br/>+DeepPotential+AttentionPotential distance+DeepMSA2</b> | 0.7494   | 7.97E-76        | 428                           |
| <b>I-TASSER<br/>+AlphaFold2 distance+DeepMSA2</b>                       | 0.8571   | 4.47E-16        | 472                           |
| <b>D-I-TASSER<br/>-DeepMSA2</b>                                         | 0.8362   | 3.63E-69        | 471                           |
| <b>D-I-TASSER<br/>-pLDDT MSA ranking</b>                                | 0.8536   | 2.99E-38        | 476                           |
| <b>AlphaFold3</b>                                                       | 0.8488   | 1.79E-07        | 466                           |
| <b>AlphaFold2.3</b>                                                     | 0.8286   | 9.25E-46        | 458                           |
| <b>AlphaFold2.2</b>                                                     | 0.8185   | 1.11E-61        | 456                           |
| <b>AlphaFold2.1</b>                                                     | 0.8179   | 2.24E-62        | 453                           |
| <b>AlphaFold2.0</b>                                                     | 0.8173   | 4.49E-63        | 452                           |

**Table S3.** The comparison of D-I-TASSER with different versions of AlphaFold on 176 non-redundant Hard targets whose structures were released after May 1, 2022. *P*-values were calculated between TM-scores by D-I-TASSER and each AlphaFold program using paired one-sided Student's *t*-tests. #{TM-score >0.5} is the number of targets with a TM-score >0.5.

| Method              | TM-score | <i>P</i> -value | #{TM-score>0.5} |
|---------------------|----------|-----------------|-----------------|
| <b>D-I-TASSER</b>   | 0.8101   | -               | 164             |
| <b>AlphaFold3</b>   | 0.7657   | 1.61E-12        | 157             |
| <b>AlphaFold2.3</b> | 0.7390   | 2.42E-23        | 148             |
| <b>AlphaFold2.2</b> | 0.7269   | 5.45E-28        | 150             |
| <b>AlphaFold2.1</b> | 0.7275   | 4.88E-27        | 150             |
| <b>AlphaFold2.0</b> | 0.7336   | 1.49E-26        | 151             |

**Table S4.** Comparison of full-chain-level modeling results by D-I-TASSER, AlphaFold2, and AlphaFold2+DeepMSA2 on the 230 multi-domain targets with different number of domains. *P*-values were calculated between TM-scores by D-I-TASSER and AlphaFold2 using paired one-sided Student's *t*-tests. #{TM-score >0.5} is the number of targets with a TM-score >0.5.

| Method                              | Type           | TM-score | <i>P</i> -value | #{TM-score>0.5} |
|-------------------------------------|----------------|----------|-----------------|-----------------|
| <b>D-I-TASSER</b>                   | All (230)      | 0.7196   | -               | 208             |
|                                     | 2-domain (167) | 0.7142   | -               | 149             |
|                                     | 3-domain (37)  | 0.7468   | -               | 34              |
|                                     | ≥4 domain (26) | 0.7154   | -               | 25              |
| <b>AlphaFold2<br/>(version 2.2)</b> | All (230)      | 0.6374   | 6.52E-28        | 193             |
|                                     | 2-domain (167) | 0.6393   | 2.59E-19        | 139             |
|                                     | 3-domain (37)  | 0.6272   | 2.04E-06        | 30              |
|                                     | ≥4 domain (26) | 0.6400   | 5.96E-05        | 24              |
| <b>AlphaFold2<br/>(version 2.3)</b> | All (230)      | 0.6379   | 1.59E-31        | 194             |
|                                     | 2-domain (167) | 0.6401   | 5.34E-22        | 140             |
|                                     | 3-domain (37)  | 0.6273   | 1.90E-06        | 30              |
|                                     | ≥4 domain (26) | 0.6386   | 2.41E-05        | 24              |
| <b>AlphaFold2<br/>+DeepMSA2</b>     | All (230)      | 0.6723   | 7.86E-34        | 198             |
|                                     | 2-domain (167) | 0.6709   | 6.98E-24        | 142             |
|                                     | 3-domain (37)  | 0.6842   | 1.43E-04        | 33              |
|                                     | ≥4 domain (26) | 0.6644   | 6.54E-06        | 23              |

**Table S5.** Comparison of domain-level modeling results between D-I-TASSER, AlphaFold2, and AlphaFold2+DeepMSA2 on the 557 domains that came from 230 multi-domain targets. *P*-values were calculated between TM-scores by D-I-TASSER and AlphaFold2 using paired one-sided Student's *t*-tests. #{TM-score >0.5} is the number of targets with a TM-score >0.5.

| Method                     | TM-score | <i>P</i> -value | #{TM-score>0.5} |
|----------------------------|----------|-----------------|-----------------|
| <b>D-I-TASSER</b>          | 0.8577   | -               | 536             |
| <b>AlphaFold2.2</b>        | 0.8341   | 1.45E-10        | 529             |
| <b>AlphaFold2.3</b>        | 0.8345   | 2.31E-16        | 530             |
| <b>AlphaFold2+DeepMSA2</b> | 0.8504   | 1.61E-06        | 534             |

**Table S6.** Comparison of the structure prediction abilities of D-I-TASSER, NBIS-AF2-standard (AlphaFold2), and Wallner group predictions on 62 Template-based modeling (TBM) and 50 Free Modeling (FM) domains from the CASP15 experiment. *P*-values were calculated between TM-scores of D-I-TASSER and AlphaFold2 models using paired one-sided Student's t-tests. #{TM-score>0.5} is the number of predicted domains with a TM-score >0.5.

| Method                                    | Domain Type | TM-score | <i>P</i> -value | #{TM-score>0.5} |
|-------------------------------------------|-------------|----------|-----------------|-----------------|
| <b>D-I-TASSER</b>                         | All (112)   | 0.878    | -               | 106             |
|                                           | TBM (62)    | 0.915    | -               | 60              |
|                                           | FM (50)     | 0.833    | -               | 46              |
| <b>NBIS-AF2-standard<br/>(AlphaFold2)</b> | All (112)   | 0.801    | 9.35E-09        | 97              |
|                                           | TBM (62)    | 0.881    | 3.89E-04        | 59              |
|                                           | FM (50)     | 0.701    | 3.41E-06        | 38              |
| <b>Wallner</b>                            | All (112)   | 0.809    | 1.30E-05        | 97              |
|                                           | TBM (62)    | 0.875    | 4.87E-04        | 58              |
|                                           | FM (50)     | 0.726    | 3.16E-03        | 39              |

**Table S7.** Comparison of structure predictions by D-I-TASSER, NBIS-AF2-standard (AlphaFold2), and Wallner group predictions on 55 single-domain and 22 multi-domain targets from the CASP15 experiment. *P*-values were calculated between TM-scores of D-I-TASSER and AlphaFold2 models using paired one-sided Student's t-tests. #{TM-score>0.5} is the number of predicted proteins with a TM-score >0.5.

| Method                                    | Target Type        | TM-score | <i>P</i> -value | #{TM-score>0.5} |
|-------------------------------------------|--------------------|----------|-----------------|-----------------|
| <b>D-I-TASSER</b>                         | All (77)           | 0.851    | -               | 72              |
|                                           | Single-domain (55) | 0.893    | -               | 52              |
|                                           | Multi-domain (22)  | 0.747    | -               | 20              |
| <b>NBIS-AF2-standard<br/>(AlphaFold2)</b> | All (77)           | 0.787    | 3.67E-05        | 64              |
|                                           | Single-domain (55) | 0.870    | 5.30E-03        | 51              |
|                                           | Multi-domain (22)  | 0.578    | 1.18E-03        | 13              |
| <b>Wallner</b>                            | All (77)           | 0.795    | 1.11E-03        | 62              |
|                                           | Single-domain (55) | 0.872    | 4.77E-02        | 49              |
|                                           | Multi-domain (22)  | 0.602    | 4.22E-03        | 13              |

**Table S8.** Results of all 132 groups (server and human) on ‘Single-domain Structure Prediction’ in CASP15. Data were copied from the CASP15 webpage at [https://predictioncenter.org/casp15/zscores\\_final.cgi?formula=assessors](https://predictioncenter.org/casp15/zscores_final.cgi?formula=assessors), in which the Group rankings are based on Assessors’ formulae, i.e., Assessor Score= $1/6*(Z\text{-score}_{\text{GDT\_HA}} + Z\text{-score}_{\text{reLLG\_lddt}} + Z\text{-score}_{\text{ASE}}) + 1/16*(Z\text{-score}_{\text{LDDT}} + Z\text{-score}_{\text{CAD\_aa}} + Z\text{-score}_{\text{SG}} + Z\text{-score}_{\text{ESC\_error}}) + 1/12*(Z\text{-score}_{\text{MolProbity}} + Z\text{-score}_{\text{BB\_error}} + Z\text{-score}_{\text{DipDiff}})$ , and two Z-score thresholds (-2.0 or -0.0) were used to excluded models. The D-I-TASSER server was registered as ‘UM-TBM’ (highlighted in bold) in the Table.

| Groups              | Rank<br>(Z>-2.0) | Sum<br>Z-score<br>(>-2.0) | Avg<br>Z-score<br>(>-2.0) | Rank<br>(Z>-0.0) | Sum<br>Z-score<br>(>-0.0) | Avg<br>Z-score<br>(>-0.0) | Groups              | Rank<br>(Z>-2.0) | Sum<br>Z-score<br>(>-2.0) | Avg<br>Z-score<br>(>-2.0) | Rank<br>(Z>-0.0) | Sum<br>Z-score<br>(>-0.0) | Avg<br>Z-score<br>(>-0.0) |
|---------------------|------------------|---------------------------|---------------------------|------------------|---------------------------|---------------------------|---------------------|------------------|---------------------------|---------------------------|------------------|---------------------------|---------------------------|
| PEZYFoldings        | 2                | 28.2448                   | 0.3014                    | 1                | 70.8310                   | 0.6620                    | Bhattacharya        | 67               | -49.9268                  | -0.4580                   | 67               | 23.1218                   | 0.2121                    |
| <b>UM-TBM</b>       | <b>1</b>         | <b>33.4626</b>            | <b>0.3070</b>             | <b>2</b>         | <b>68.5623</b>            | <b>0.6290</b>             | Zheng               | 81               | -121.1419                 | 0.1524                    | 68               | 22.9098                   | 0.5091                    |
| Yang-Server         | 4                | 20.0022                   | 0.2037                    | 3                | 61.2772                   | 0.5674                    | FTBiot0119          | 69               | -76.4316                  | -0.7012                   | 69               | 22.8312                   | 0.2095                    |
| DFolding            | 3                | 25.8625                   | 0.2373                    | 4                | 61.0695                   | 0.5603                    | Graphen_Medical     | 72               | -82.3454                  | -0.1417                   | 70               | 22.4165                   | 0.3071                    |
| Yang                | 5                | 16.2255                   | 0.1688                    | 5                | 59.0136                   | 0.5464                    | GinobiFold          | 66               | -43.2247                  | -0.3512                   | 71               | 22.2223                   | 0.2096                    |
| McGuffin            | 19               | 2.6214                    | 0.0240                    | 6                | 49.7262                   | 0.4562                    | GinobiFold-SER      | 65               | -36.4549                  | -0.2710                   | 72               | 21.8518                   | 0.2081                    |
| MULTICOM            | 21               | 2.3021                    | 0.0211                    | 7                | 48.8284                   | 0.4480                    | Seder2022easy       | 73               | -83.5517                  | -0.7316                   | 73               | 21.8495                   | 0.2061                    |
| MULTICOM_refine     | 6                | 13.6109                   | 0.1249                    | 8                | 48.8258                   | 0.4479                    | NBIS-AF2-multimer   | 80               | -114.7135                 | 0.0657                    | 74               | 21.2860                   | 0.4257                    |
| BAKER               | 11               | 4.3748                    | 0.0401                    | 9                | 47.9903                   | 0.4403                    | Yang-Multimer       | 82               | -122.2089                 | 0.1287                    | 75               | 21.2429                   | 0.4721                    |
| MULTICOM_human      | 20               | 2.4662                    | 0.0226                    | 10               | 47.9002                   | 0.4395                    | ESM-single-sequence | 70               | -77.8559                  | -0.4931                   | 76               | 20.0903                   | 0.2160                    |
| MULTICOM_deep       | 8                | 9.8068                    | 0.0900                    | 11               | 46.2544                   | 0.4244                    | RaptorX-Multimer    | 85               | -128.2922                 | -0.0065                   | 77               | 19.6842                   | 0.4374                    |
| MULTICOM_qa         | 9                | 9.4572                    | 0.0868                    | 12               | 46.2344                   | 0.4242                    | Takeda-Shitaka_Lab  | 84               | -124.3999                 | 0.0800                    | 78               | 19.1241                   | 0.4250                    |
| MULTICOM_egnn       | 7                | 11.9136                   | 0.1093                    | 13               | 45.7611                   | 0.4198                    | Seder2022hard       | 77               | -96.8854                  | -0.7115                   | 79               | 19.0334                   | 0.2025                    |
| Manifold-E          | 34               | -5.7186                   | -0.0525                   | 14               | 45.1978                   | 0.4147                    | SHT                 | 74               | -86.0486                  | -0.6255                   | 80               | 18.2032                   | 0.1896                    |
| Kiharalab           | 25               | -0.9270                   | -0.0085                   | 15               | 45.1273                   | 0.4140                    | Grudin              | 87               | -130.8786                 | -0.0200                   | 81               | 16.7652                   | 0.3810                    |
| MUFold_H            | 12               | 4.2297                    | 0.0388                    | 16               | 44.2540                   | 0.4060                    | Agemo               | 76               | -90.3782                  | -0.8292                   | 82               | 16.1139                   | 0.1478                    |
| ColabFold           | 10               | 4.9637                    | 0.0455                    | 17               | 44.0177                   | 0.4038                    | DFolding-refine     | 75               | -89.0381                  | -0.7834                   | 83               | 14.5185                   | 0.1370                    |
| colabfold_human     | 18               | 2.9425                    | 0.0270                    | 18               | 43.2644                   | 0.3969                    | EMBER3D             | 88               | -132.7949                 | -1.0739                   | 84               | 13.8847                   | 0.1509                    |
| Wallner             | 14               | 4.0416                    | 0.0371                    | 19               | 43.1163                   | 0.3956                    | CoDock              | 89               | -135.5668                 | -0.2461                   | 85               | 12.3283                   | 0.2623                    |
| Asclepius           | 26               | -1.5361                   | 0.0043                    | 20               | 43.0518                   | 0.3986                    | QUIC                | 79               | -110.2350                 | -0.9537                   | 86               | 11.2555                   | 0.1093                    |
| bench               | 16               | 3.7085                    | 0.0529                    | 21               | 42.8291                   | 0.3966                    | PICNIC              | 86               | -129.3268                 | -1.1307                   | 87               | 10.7159                   | 0.1051                    |
| Manifold            | 39               | -6.4946                   | -0.0596                   | 22               | 42.8201                   | 0.3928                    | Pierce              | 98               | -169.8130                 | -0.2153                   | 88               | 10.5512                   | 0.3908                    |
| DFolding-server     | 13               | 4.0592                    | 0.0372                    | 23               | 41.9520                   | 0.3849                    | RostlabUeFOFold     | 92               | -155.9174                 | -1.2429                   | 89               | 9.2273                    | 0.1125                    |
| Elofsson            | 59               | -23.6888                  | 0.1121                    | 24               | 41.7392                   | 0.4537                    | Shen-CAPRI          | 94               | -160.2618                 | -0.3018                   | 90               | 8.4582                    | 0.2488                    |
| MUFold              | 15               | 3.8458                    | 0.0353                    | 25               | 40.9513                   | 0.3757                    | UNRES               | 78               | -105.8942                 | -0.9116                   | 91               | 8.1109                    | 0.0787                    |
| RaptorX             | 17               | 2.9560                    | 0.0271                    | 26               | 40.5804                   | 0.3723                    | Zou                 | 95               | -160.8293                 | -0.6056                   | 92               | 8.0372                    | 0.1960                    |
| Agemo_mix           | 32               | -4.2573                   | -0.0391                   | 27               | 40.4984                   | 0.3715                    | WL_team             | 83               | -123.6216                 | -0.9852                   | 93               | 8.0090                    | 0.0861                    |
| ShanghaiTech        | 47               | -11.8306                  | -0.1085                   | 28               | 40.1253                   | 0.3681                    | wuqi                | 91               | -143.2171                 | -1.1404                   | 94               | 7.7618                    | 0.0892                    |
| UltraFold_Server    | 22               | 1.0805                    | 0.0099                    | 29               | 40.0715                   | 0.3676                    | ClusPro             | 100              | -174.4625                 | -0.9634                   | 95               | 5.6107                    | 0.1336                    |
| UltraFold           | 30               | -3.9657                   | 0.0003                    | 30               | 39.7243                   | 0.3713                    | Fernandez-Recio     | 102              | -181.0940                 | -0.9145                   | 96               | 5.1969                    | 0.1528                    |
| B11L                | 44               | -10.2095                  | 0.0372                    | 31               | 38.2788                   | 0.3753                    | TB_model_prediction | 109              | -191.2786                 | 0.0555                    | 97               | 5.1589                    | 0.3968                    |
| GuijunLab-DeepDA    | 23               | -0.4924                   | -0.0045                   | 32               | 38.2400                   | 0.3508                    | Alchemi_LIG2        | 113              | -194.8586                 | -0.2199                   | 98               | 4.5994                    | 0.3538                    |
| BeijingAIProtein    | 49               | -12.5932                  | -0.0058                   | 33               | 38.0237                   | 0.3692                    | Alchemi_LIG         | 113              | -194.8586                 | -0.2199                   | 98               | 4.5994                    | 0.3538                    |
| ChaePred            | 33               | -5.5144                   | -0.0142                   | 34               | 37.9319                   | 0.3545                    | Alchemi_LIG3        | 112              | -194.8543                 | -0.2196                   | 100              | 4.5960                    | 0.3535                    |
| Shennong            | 28               | -2.8649                   | 0.0489                    | 35               | 37.3845                   | 0.3560                    | Panlab              | 90               | -143.0865                 | -1.3127                   | 101              | 4.3993                    | 0.0404                    |
| MultifOLD           | 48               | -12.1034                  | -0.1110                   | 36               | 36.6712                   | 0.3364                    | Manifold-X          | 107              | -189.7355                 | -0.4298                   | 102              | 4.2898                    | 0.2383                    |
| GuijunLab-Assembly  | 27               | -2.6529                   | -0.0243                   | 37               | 36.4567                   | 0.3345                    | DELCLAB             | 93               | -157.8925                 | -1.3803                   | 103              | 3.8920                    | 0.0401                    |
| GuijunLab-Human     | 36               | -6.2358                   | -0.0209                   | 38               | 36.2609                   | 0.3389                    | Kozakov-Vajda       | 106              | -188.8308                 | -0.9582                   | 104              | 3.8780                    | 0.1385                    |
| Kiharalab_Server    | 43               | -10.1914                  | -0.0935                   | 39               | 36.0746                   | 0.3310                    | ACOMPMOD            | 111              | -193.4552                 | -1.6853                   | 105              | 3.7334                    | 0.0479                    |
| server_124          | 40               | -6.7143                   | -0.0616                   | 40               | 35.8061                   | 0.3285                    | SHORTLE             | 101              | -174.8588                 | -1.1541                   | 106              | 3.6861                    | 0.0723                    |
| GuijunLab-Threader  | 31               | -4.1330                   | -0.0379                   | 41               | 35.6270                   | 0.3269                    | TensorLab           | 116              | -198.8770                 | -0.2615                   | 107              | 3.5494                    | 0.3227                    |
| hFold_human         | 24               | -0.8240                   | -0.0076                   | 42               | 35.1927                   | 0.3229                    | Pan_Server          | 96               | -164.4871                 | -1.4855                   | 108              | 2.9232                    | 0.0281                    |
| BAKER-SERVER        | 52               | -14.2912                  | -0.1311                   | 43               | 35.1349                   | 0.3223                    | Manifold-LC-E       | 115              | -196.1421                 | -0.5428                   | 109              | 2.8952                    | 0.1930                    |
| hFold               | 35               | -5.7866                   | 0.0020                    | 44               | 35.0783                   | 0.3309                    | Convex-PL           | 120              | -206.2240                 | -0.0373                   | 110              | 2.6877                    | 0.4479                    |
| NBIS-AF2-standard   | 29               | -2.8881                   | -0.0265                   | 45               | 34.6335                   | 0.3177                    | UTMB                | 119              | -205.8203                 | 0.0299                    | 111              | 2.5274                    | 0.4212                    |
| IntFOLD7            | 57               | -20.4751                  | -0.1878                   | 46               | 34.4688                   | 0.3162                    | FALCON2             | 104              | -182.3897                 | -1.6672                   | 112              | 2.4164                    | 0.0226                    |
| hks1988             | 38               | -6.4477                   | -0.0592                   | 47               | 34.4345                   | 0.3159                    | FALCON0             | 103              | -182.1541                 | -1.6650                   | 113              | 2.4086                    | 0.0225                    |
| DMP                 | 64               | -36.1319                  | -0.1055                   | 48               | 34.0681                   | 0.3549                    | noxelis             | 123              | -207.4929                 | 0.1014                    | 114              | 2.4028                    | 0.4806                    |
| FoldEver            | 42               | -9.9724                   | -0.0915                   | 49               | 33.8486                   | 0.3105                    | KORP-PL             | 118              | -204.0169                 | -0.2521                   | 115              | 2.3884                    | 0.2985                    |
| GuijunLab-Meta      | 37               | -6.2794                   | -0.0213                   | 50               | 33.6273                   | 0.3143                    | MESHI_server        | 99               | -172.4795                 | -1.4010                   | 116              | 2.3765                    | 0.0313                    |
| AP_1                | 51               | -14.1961                  | -0.1302                   | 51               | 33.5073                   | 0.3074                    | MESHI               | 97               | -165.2689                 | -1.2467                   | 117              | 2.1919                    | 0.0313                    |
| server_122          | 45               | -10.4840                  | -0.0962                   | 52               | 33.4822                   | 0.3072                    | ddquest             | 122              | -207.4390                 | 0.1122                    | 118              | 2.1296                    | 0.4259                    |
| OpenFold            | 55               | -19.6548                  | -0.1635                   | 53               | 33.2518                   | 0.3079                    | Convex-PL-R         | 121              | -207.0127                 | -0.1688                   | 119              | 1.9614                    | 0.3269                    |
| server_125          | 46               | -10.9894                  | -0.1008                   | 54               | 33.0675                   | 0.3034                    | zax                 | 124              | -209.0193                 | -0.8774                   | 120              | 1.4544                    | 0.1818                    |
| OpenFold-SingleSeq  | 56               | -19.8857                  | -0.1656                   | 55               | 32.9778                   | 0.3054                    | Gonglab-THU         | 108              | -190.9123                 | -1.7515                   | 121              | 1.4451                    | 0.0133                    |
| server_123          | 50               | -13.1209                  | -0.1204                   | 56               | 32.9353                   | 0.3022                    | bio3d               | 129              | -214.0009                 | -0.0005                   | 122              | 1.2791                    | 0.6396                    |
| FoldEver-Hybrid     | 58               | -22.2976                  | -0.0624                   | 57               | 32.9350                   | 0.3261                    | MeilerLab           | 125              | -211.5698                 | 0.1434                    | 123              | 1.2702                    | 0.4234                    |
| server_126          | 41               | -8.4517                   | -0.0775                   | 58               | 32.8951                   | 0.3018                    | Cerebra             | 110              | -192.3969                 | -1.7651                   | 124              | 1.0310                    | 0.0095                    |
| Venclovas           | 71               | -78.8584                  | -0.1197                   | 59               | 32.2406                   | 0.4357                    | Spider              | 117              | -200.0590                 | -1.4563                   | 125              | 0.9318                    | 0.0282                    |
| Manifold-serv       | 53               | -14.4926                  | -0.1330                   | 60               | 30.3083                   | 0.2781                    | FEIGLAB             | 126              | -212.2364                 | -0.0788                   | 126              | 0.7872                    | 0.2624                    |
| TRFold              | 60               | -27.0165                  | -0.2316                   | 61               | 29.4315                   | 0.2725                    | BhageerathH-Pro     | 105              | -185.0512                 | -1.6801                   | 127              | 0.6974                    | 0.0068                    |
| GuijunLab-RocketX   | 54               | -15.7410                  | -0.1272                   | 62               | 29.3099                   | 0.2714                    | Sun_Tsinghua        | 127              | -213.0850                 | -1.7766                   | 128              | 0.6866                    | 0.0312                    |
| trComplex           | 61               | -28.1287                  | -0.2419                   | 63               | 29.2205                   | 0.2706                    | PerezLab_Gators     | 128              | -213.5777                 | -0.5259                   | 129              | 0.2630                    | 0.0877                    |
| XRC_VU              | 68               | -61.0768                  | -0.0385                   | 64               | 26.1843                   | 0.3273                    | CSRC_ICM            | 132              | -217.1089                 | -1.1089                   | 130              | 0.2540                    | 0.2540                    |
| ShanghaiTech-TS-SER | 62               | -32.4376                  | -0.2327                   | 65               | 26.0202                   | 0.2478                    | coco                | 130              | -215.3389                 | -0.6695                   | 131              | 0.2100                    | 0.1050                    |
| Coqualia            | 63               | -35.7053                  | -0.2472                   | 66               | 24.0265                   | 0.2310                    | GatorsML            | 131              | -216.4563                 | -1.4854                   | 132              | 0.1091                    | 0.0364                    |

**Table S9.** Results of all 98 groups (server and human) on ‘Inter-domain Structure Prediction’ in CASP15. Data are copied from the official CASP15 webpage at [https://predictioncenter.org/casp15/zscores\\_interdomain.cgi](https://predictioncenter.org/casp15/zscores_interdomain.cgi), in which the ranking of the groups is based on the linear combination Z-score (F1) + Z-score (Jaccard score) + Z-score (QS\_best), with models having a Z-score below the tolerance threshold (-0.0) excluded. The D-I-TASSER server was registered as ‘UM-TBM’ (highlighted in bold) in the table.

| #  | Groups             | Sum Z-score<br>(>-0.0) | Avg Z-score<br>(>-0.0) | #  | Groups                   | Sum Z-score<br>(>-0.0) | Avg Z-score<br>(>-0.0) |
|----|--------------------|------------------------|------------------------|----|--------------------------|------------------------|------------------------|
| 1  | <b>UM-TBM</b>      | <b>35.5277</b>         | <b>1.7764</b>          | 50 | Kiharalab                | 5.4940                 | 0.2747                 |
| 2  | Yang-Server        | 24.9602                | 1.2480                 | 51 | MULTICOM_deep            | 5.4897                 | 0.2889                 |
| 3  | Yang               | 19.7115                | 0.9856                 | 52 | Seder2022easy            | 5.3198                 | 0.2800                 |
| 4  | PEZYFoldings       | 18.0578                | 1.2039                 | 53 | GuijunLab-DeepDA         | 4.8945                 | 0.2576                 |
| 5  | Manifold           | 14.9308                | 0.7858                 | 54 | XRC_VU                   | 4.8243                 | 0.6892                 |
| 6  | Venclovas          | 14.5386                | 0.7652                 | 55 | ColabFold                | 4.7985                 | 0.2399                 |
| 7  | server_124         | 14.0810                | 0.7040                 | 56 | colabfold_human          | 4.7985                 | 0.2399                 |
| 8  | DFolding           | 13.1098                | 0.6555                 | 57 | GuijunLab-Assembly       | 4.3734                 | 0.2302                 |
| 9  | bench              | 12.0811                | 0.6041                 | 58 | Wallner                  | 4.1617                 | 0.2312                 |
| 10 | BAKER-SERVER       | 12.0030                | 0.6002                 | 59 | FoldEver                 | 3.9173                 | 0.2062                 |
| 11 | Manifold-E         | 11.6732                | 0.6144                 | 60 | MULTICOM                 | 3.9011                 | 0.2167                 |
| 12 | DFolding-server    | 11.5870                | 0.6098                 | 61 | MULTICOM_human           | 3.6862                 | 0.2048                 |
| 13 | server_126         | 10.9291                | 0.5465                 | 62 | GuijunLab-Meta           | 3.6577                 | 0.1925                 |
| 14 | Shennong           | 10.1011                | 0.5051                 | 63 | MULTICOM_qa              | 3.5934                 | 0.1797                 |
| 15 | RaptorX            | 9.3845                 | 0.4692                 | 64 | GuijunLab-Human          | 3.4694                 | 0.1826                 |
| 16 | IntFOLD7           | 9.0429                 | 0.4759                 | 65 | FoldEver-Hybrid          | 3.3126                 | 0.2366                 |
| 17 | BAKER              | 8.8620                 | 0.4431                 | 66 | MULTICOM_egnn            | 3.1465                 | 0.1573                 |
| 18 | server_123         | 8.5973                 | 0.4299                 | 67 | GinobiFold               | 2.7459                 | 0.1615                 |
| 19 | Asclepius          | 8.5891                 | 0.4521                 | 68 | Coqualia                 | 2.7459                 | 0.1615                 |
| 20 | MultiFOLD          | 8.2488                 | 0.4583                 | 69 | Cerebra                  | 2.5507                 | 0.1500                 |
| 21 | DFolding-refine    | 8.1694                 | 0.4300                 | 70 | MUFold                   | 2.4377                 | 0.1219                 |
| 22 | B11L               | 8.0841                 | 0.4491                 | 71 | GuijunLab-RocketX        | 2.4240                 | 0.1276                 |
| 23 | DMP                | 7.7417                 | 0.5530                 | 72 | GuijunLab-Threadder      | 2.4147                 | 0.1342                 |
| 24 | MUFold_H           | 7.5603                 | 0.3780                 | 73 | Bhattacharya             | 2.3720                 | 0.1248                 |
| 25 | hFold              | 7.1212                 | 0.4451                 | 74 | SHT                      | 2.2983                 | 0.1149                 |
| 26 | OpenFold-SingleSeq | 7.0733                 | 0.3723                 | 75 | BhageerathH-Pro          | 2.2781                 | 0.1627                 |
| 27 | OpenFold           | 7.0733                 | 0.3723                 | 76 | GinobiFold-SER           | 2.2577                 | 0.1411                 |
| 28 | ShanghaiTech       | 7.0584                 | 0.3529                 | 77 | FALCON2                  | 2.2265                 | 0.1113                 |
| 29 | ManiFold-serv      | 6.9819                 | 0.3675                 | 78 | FALCON0                  | 2.2265                 | 0.1113                 |
| 30 | Graphen_Medical    | 6.8295                 | 0.4878                 | 79 | hks1988                  | 2.1535                 | 0.1077                 |
| 31 | AP_1               | 6.8095                 | 0.3405                 | 80 | <b>NBIS-AF2-standard</b> | <b>2.1141</b>          | <b>0.1057</b>          |
| 32 | Elofsson           | 6.6876                 | 0.3520                 | 81 | Pan_Server               | 2.0335                 | 0.1070                 |
| 33 | Agemo_mix          | 6.6477                 | 0.3499                 | 82 | Gonglab-THU              | 1.8164                 | 0.1068                 |
| 34 | Panlab             | 6.5871                 | 0.3294                 | 83 | DELCLAB                  | 1.1885                 | 0.0660                 |
| 35 | McGuffin           | 6.5509                 | 0.3448                 | 84 | ESM-single-sequence      | 1.1811                 | 0.1312                 |
| 36 | TRFold             | 6.4502                 | 0.3794                 | 85 | UNRES                    | 1.1657                 | 0.0833                 |
| 37 | MULTICOM_refine    | 6.4210                 | 0.3379                 | 86 | QUIC                     | 1.1187                 | 0.0559                 |
| 38 | server_122         | 6.1989                 | 0.3099                 | 87 | PICNIC                   | 1.1002                 | 0.0550                 |
| 39 | BeijingAIProtein   | 6.1858                 | 0.3639                 | 88 | ShanghaiTech-TS-SER      | 0.8613                 | 0.0538                 |
| 40 | UltraFold          | 6.1858                 | 0.3639                 | 89 | Seder2022hard            | 0.5910                 | 0.0591                 |
| 41 | UltraFold_Server   | 6.1858                 | 0.3437                 | 90 | SHORTLE                  | 0.5900                 | 0.5900                 |
| 42 | server_125         | 6.0672                 | 0.3034                 | 91 | wuqi                     | 0.4176                 | 0.0464                 |
| 43 | Agemo              | 5.9827                 | 0.3519                 | 92 | MESHI_server             | 0.1894                 | 0.0947                 |
| 44 | FTBiot0119         | 5.9501                 | 0.2975                 | 93 | EMBER3D                  | 0.1591                 | 0.0159                 |
| 45 | ChaePred           | 5.7616                 | 0.2881                 | 94 | Manifold-LC-E            | 0.0809                 | 0.0809                 |
| 46 | WL_team            | 5.7417                 | 0.3022                 | 95 | Manifold-X               | 0.0809                 | 0.0809                 |
| 47 | Kiharalab_Server   | 5.7358                 | 0.2868                 | 96 | RostlabUeFOFold          | 0.0346                 | 0.0087                 |
| 48 | trComplex          | 5.6135                 | 0.3302                 | 97 | MESHI                    | 0.0000                 | 0.0000                 |
| 49 | hFold_human        | 5.5688                 | 0.3094                 | 98 | ACOMPMOD                 | 0.0000                 | 0.0000                 |

**Table S10.** The comparison of D-I-TASSER with different versions of AlphaFold (including AlphaFold3, AlphaFold2.3, AlphaFold2.2, AlphaFold2.1, and AlphaFold2.0) on 50 Free Modeling (FM) domains and 22 multi-domain targets from the CASP15 experiment. *P*-values were calculated between TM-scores by D-I-TASSER and others using paired one-sided Student’s t-tests. #{TM-score >0.5} is the number of targets with a TM-score >0.5.

| Method              | Target Type       | TM-score | <i>P</i> -value | #{TM-score>0.5} |
|---------------------|-------------------|----------|-----------------|-----------------|
| <b>D-I-TASSER</b>   | FM (50)           | 0.8326   | -               | 46              |
|                     | Multi-domain (20) | 0.7419   | -               | 18              |
| <b>AlphaFold2.0</b> | FM (50)           | 0.7149   | 1.04E-05        | 37              |
|                     | Multi-domain (20) | 0.5988   | 8.59E-03        | 13              |
| <b>AlphaFold2.1</b> | FM (50)           | 0.7230   | 8.34E-06        | 38              |
|                     | Multi-domain (20) | 0.5980   | 6.81E-03        | 11              |
| <b>AlphaFold2.2</b> | FM (50)           | 0.7212   | 6.10E-05        | 37              |
|                     | Multi-domain (20) | 0.5947   | 5.34E-03        | 12              |
| <b>AlphaFold2.3</b> | FM (50)           | 0.7262   | 2.55E-04        | 38              |
|                     | Multi-domain (20) | 0.5920   | 8.59E-03        | 13              |
| <b>AlphaFold3</b>   | FM (50)           | 0.7265   | 4.65E-04        | 39              |
|                     | Multi-domain (20) | 0.6088   | 2.00E-02        | 12              |

**Table S11.** The structure prediction accuracy of D-I-TASSER and AlphaFold2 on 1,907 full-chain sequences from the human genome that have experimentally solved structures. These sequences contain 1,147 cases with single-domain and 760 cases with multi-domain structures. *P*-values were calculated between TM-scores of D-I-TASSER and AlphaFold2 models using paired one-sided Student’s t-tests. #{TM-score>0.5} is the number of predicted proteins with a TM-score >0.5.

| Method            | Target Type           | TM-score | <i>P</i> -value | #{TM-score>0.5} |
|-------------------|-----------------------|----------|-----------------|-----------------|
| <b>D-I-TASSER</b> | All (1,907)           | 0.931    | -               | 1,872           |
|                   | Single-domain (1,147) | 0.918    | -               | 1,119           |
|                   | Multi-domain (760)    | 0.951    | -               | 753             |
| <b>AlphaFold2</b> | All (1,907)           | 0.916    | 3.17E-130       | 1,865           |
|                   | Single-domain (1,147) | 0.903    | 5.69E-84        | 1,113           |
|                   | Multi-domain (760)    | 0.935    | 1.07E-47        | 752             |

**Table S12.** The results are the same as shown in Table S9, but the 1,907 proteins are categorized into two categories of ‘Easy-zone’ and ‘Hard-zone’ based on the D-I-TASSER and AlphaFold2 results. The ‘Easy-zone’ targets refer to those for which both D-I-TASSER and AlphaFold2 can achieve a TM-score >0.8, while the ‘Hard-zone’ targets are those for which at least one method performs poorly with a TM-score <0.8. *P*-values were calculated between TM-scores of D-I-TASSER and AlphaFold2 models using paired one-sided Student’s t-tests. #{TM-score>0.5} is the number of predicted proteins with a TM-score >0.5.

| Method            | Target Type       | TM-score | <i>P</i> -value | #{TM-score>0.5} |
|-------------------|-------------------|----------|-----------------|-----------------|
| <b>D-I-TASSER</b> | All (1,907)       | 0.931    | -               | 1,872           |
|                   | Easy-zone (1,659) | 0.966    | -               | 1,659           |
|                   | Hard-zone (248)   | 0.699    | -               | 213             |
| <b>AlphaFold2</b> | All (1,907)       | 0.916    | 3.17E-130       | 1,865           |
|                   | Easy-zone (1,659) | 0.958    | 2.47E-97        | 1,659           |
|                   | Hard-zone (248)   | 0.633    | 1.17E-26        | 206             |

**Table S13.** Statistical summary of the top 20 most abundant prediction results for ligand-binding interactions, EC terms, and GO terms (BP, CC, and MF) for foldable full-chain human proteins. #{protein} is the number of proteins with the corresponding labels.

| Type           | ID         | Name                                                                                                                             | #{protein} |
|----------------|------------|----------------------------------------------------------------------------------------------------------------------------------|------------|
| Ligand-binding | ANP        | ADENYLYL IMIDODIPHOSPHATE                                                                                                        | 308        |
|                | FES        | DI-MU-SULFIDO-DIIRON                                                                                                             | 306        |
|                | F3S        | TRI-MU-SULFIDO-MU3-SULFIDO-TRIIRON                                                                                               | 228        |
|                | ADP        | ADENOSINE 5'-DIPHOSPHATE                                                                                                         | 226        |
|                | CA         | CALCIUM                                                                                                                          | 222        |
|                | RET        | RETINAL                                                                                                                          | 212        |
|                | SF4        | TETRA-MU3-SULFIDO-TETRAIRON                                                                                                      | 204        |
|                | QNA        | 1~{A}~{R},7~{B}~{S})-5-FLUORANYL-2,2-BIS(OXIDANYL)-1~{A},7~{B}-DIHYDRO-1~{H}-CYCLOPROPA[C][1,2]BENZOXABORININE-4-CARBOXYLIC ACID | 203        |
|                | CLR        | CHOLESTEROL                                                                                                                      | 164        |
|                | HEM        | PROTOHEME                                                                                                                        | 147        |
|                | ATP        | ADENOSINE-5'-TRIPHOSPHATE                                                                                                        | 131        |
|                | FAD        | FLAVIN ADENINE DINUCLEOTIDE                                                                                                      | 126        |
|                | GDP        | GUANOSINE-5'-DIPHOSPHATE                                                                                                         | 123        |
|                | GNP        | PHOSPHOAMINOPHOSPHONIC ACID-GUANYLATE ESTER                                                                                      | 115        |
|                | ZN         | ZINC ION                                                                                                                         | 109        |
|                | NA         | SODIUM ION                                                                                                                       | 108        |
|                | NAD        | NICOTINAMIDE-ADENINE-DINUCLEOTIDE                                                                                                | 104        |
|                | FMN        | FLAVIN MONONUCLEOTIDE                                                                                                            | 98         |
|                | NAP        | NICOTINAMIDE-ADENINE-DINUCLEOTIDE PHOSPHATE                                                                                      | 90         |
|                | PTY        | PHOSPHATIDYLETHANOLAMINE                                                                                                         | 82         |
| EC             | 3.2.1.17   | Lysozyme                                                                                                                         | 426        |
|                | 2.7.7.6    | DNA-directed RNA polymerase                                                                                                      | 338        |
|                | 1.17.1.4   | Xanthine dehydrogenase                                                                                                           | 335        |
|                | 2.3.1.86   | Fatty-acyl-CoA synthase                                                                                                          | 295        |
|                | 3.4.24.69  | Bontoxilysin                                                                                                                     | 289        |
|                | 1.17.3.2   | Xanthine oxidase                                                                                                                 | 280        |
|                | 2.7.11.1   | Non-specific serine/threonine protein kinase                                                                                     | 258        |
|                | 1.4.1.13   | Glutamate synthase (NADPH)                                                                                                       | 233        |
|                | 2.3.1.85   | Fatty-acid synthase                                                                                                              | 167        |
|                | 1.4.7.1    | Glutamate synthase (ferredoxin)                                                                                                  | 162        |
|                | 3.2.1.18   | Exo-alpha-sialidase                                                                                                              | 160        |
|                | 1.9.3.1    | Cytochrome-c oxidase                                                                                                             | 150        |
|                | 4.3.2.2    | Adenylosuccinate lyase                                                                                                           | 150        |
|                | 3.6.5.2    | Small monomeric GTPase                                                                                                           | 148        |
|                | 2.7.7.7    | DNA-directed DNA polymerase                                                                                                      | 142        |
|                | 4.2.1.2    | Fumarate hydratase                                                                                                               | 138        |
|                | 3.2.1.97   | Endo-alpha-N-acetylgalactosaminidase                                                                                             | 125        |
|                | 3.2.1.41   | Pullulanase                                                                                                                      | 122        |
|                | 2.7.10.1   | Receptor protein-tyrosine kinase                                                                                                 | 116        |
|                | 4.3.2.1    | Argininosuccinate lyase                                                                                                          | 103        |
| BP             | GO:0055114 | oxidation-reduction process                                                                                                      | 1,026      |
|                | GO:0043547 | positive regulation of GTPase activity                                                                                           | 772        |
|                | GO:0030335 | positive regulation of cell migration                                                                                            | 687        |
|                | GO:0009612 | response to mechanical stimulus                                                                                                  | 678        |
|                | GO:0098542 | defense response to other organism                                                                                               | 628        |
|                | GO:0097305 | response to alcohol                                                                                                              | 616        |
|                | GO:0019058 | viral life cycle                                                                                                                 | 589        |
|                | GO:0007601 | visual perception                                                                                                                | 584        |



|    |            |                                                      |       |
|----|------------|------------------------------------------------------|-------|
|    | GO:0007613 | memory                                               | 577   |
|    | GO:0044248 | cellular catabolic process                           | 573   |
|    | GO:0018298 | protein-chromophore linkage                          | 572   |
|    | GO:0050806 | positive regulation of synaptic transmission         | 568   |
|    | GO:0001101 | response to acid chemical                            | 567   |
|    | GO:0007612 | learning                                             | 561   |
|    | GO:0000302 | response to reactive oxygen species                  | 561   |
|    | GO:0050678 | regulation of epithelial cell proliferation          | 552   |
|    | GO:0019229 | regulation of vasoconstriction                       | 551   |
|    | GO:1901654 | response to ketone                                   | 551   |
|    | GO:0009617 | response to bacterium                                | 548   |
|    | GO:1903532 | positive regulation of secretion by cell             | 547   |
| CC | GO:0005829 | cytosol                                              | 3,085 |
|    | GO:0070062 | extracellular exosome                                | 2,362 |
|    | GO:0016021 | integral component of membrane                       | 1,556 |
|    | GO:0005887 | integral component of plasma membrane                | 1,555 |
|    | GO:0005886 | plasma membrane                                      | 1,239 |
|    | GO:0044444 | cytoplasmic part                                     | 1,175 |
|    | GO:0071944 | cell periphery                                       | 983   |
|    | GO:0005654 | nucleoplasm                                          | 973   |
|    | GO:0005615 | extracellular space                                  | 945   |
|    | GO:0005789 | endoplasmic reticulum membrane                       | 912   |
|    | GO:0005634 | nucleus                                              | 910   |
|    | GO:1903561 | extracellular vesicle                                | 846   |
|    | GO:0043231 | intracellular membrane-bounded organelle             | 814   |
|    | GO:0005737 | cytoplasm                                            | 801   |
|    | GO:0000139 | Golgi membrane                                       | 769   |
|    | GO:0031988 | membrane-bounded vesicle                             | 762   |
|    | GO:0043005 | neuron projection                                    | 703   |
|    | GO:0044424 | intracellular part                                   | 666   |
|    | GO:0036477 | somatodendritic compartment                          | 637   |
|    | GO:0005911 | cell-cell junction                                   | 632   |
| MF | GO:0046872 | metal ion binding                                    | 1,754 |
|    | GO:0043169 | cation binding                                       | 1,490 |
|    | GO:0032550 | purine ribonucleoside binding                        | 1,432 |
|    | GO:0035639 | purine ribonucleoside triphosphate binding           | 1,430 |
|    | GO:0032559 | adenyl ribonucleotide binding                        | 1,387 |
|    | GO:0005524 | ATP binding                                          | 1,369 |
|    | GO:0042802 | identical protein binding                            | 1,255 |
|    | GO:0042803 | protein homodimerization activity                    | 886   |
|    | GO:0008092 | cytoskeletal protein binding                         | 878   |
|    | GO:0046914 | transition metal ion binding                         | 708   |
|    | GO:0003676 | nucleic acid binding                                 | 693   |
|    | GO:0019842 | vitamin binding                                      | 658   |
|    | GO:0046983 | protein dimerization activity                        | 638   |
|    | GO:0004553 | hydrolase activity, hydrolyzing O-glycosyl compounds | 547   |
|    | GO:0008270 | zinc ion binding                                     | 517   |
|    | GO:0044822 | poly(A) RNA binding                                  | 500   |
|    | GO:0005509 | calcium ion binding                                  | 493   |
|    | GO:0005501 | retinoid binding                                     | 463   |
|    | GO:0008020 | G-protein coupled photoreceptor activity             | 463   |
|    | GO:0005515 | protein binding                                      | 453   |

## REFERENCES

1. UniProt, C. UniProt: the Universal Protein Knowledgebase in 2023. *Nucleic Acids Res* **51**, D523-D531 (2023).
2. Steinegger, M. & Soding, J. MMseqs2 enables sensitive protein sequence searching for the analysis of massive data sets. *Nat Biotechnol* **35**, 1026-1028 (2017).
3. Hyatt, D. et al. Prodigal: prokaryotic gene recognition and translation initiation site identification. *BMC Bioinformatics* **11**, 119 (2010).
4. Chen, I.M.A. et al. IMG/M v.5.0: an integrated data management and comparative analysis system for microbial genomes and microbiomes. *Nucleic Acids Research* **47**, D666-D677 (2019).
5. Hunter, S. et al. EBI metagenomics--a new resource for the analysis and archiving of metagenomic data. *Nucleic Acids Res* **42**, D600-606 (2014).
6. Steinegger, M., Mirdita, M. & Soding, J. Protein-level assembly increases protein sequence recovery from metagenomic samples manyfold. *Nat Methods* **16**, 603-606 (2019).
7. Li, W. & Godzik, A. Cd-hit: a fast program for clustering and comparing large sets of protein or nucleotide sequences. *Bioinformatics* **22**, 1658-1659 (2006).
8. Rho, M., Tang, H. & Ye, Y. FragGeneScan: predicting genes in short and error-prone reads. *Nucleic Acids Research* **38**, e191-e191 (2010).
9. Zhang, C., Zheng, W., Mortuza, S.M., Li, Y. & Zhang, Y. DeepMSA: constructing deep multiple sequence alignment to improve contact prediction and fold-recognition for distant-homology proteins. *Bioinformatics* **36**, 2105-2112 (2019).
10. Remmert, M., Biegert, A., Hauser, A. & Söding, J. HHblits: lightning-fast iterative protein sequence searching by HMM-HMM alignment. *Nature Methods* **9**, 173-175 (2012).
11. Steinegger, M. et al. HH-suite3 for fast remote homology detection and deep protein annotation. *BMC Bioinformatics* **20**, 473 (2019).
12. Mirdita, M. et al. Uniclust databases of clustered and deeply annotated protein sequences and alignments. *Nucleic Acids Research* **45**, D170-D176 (2016).
13. Eddy, S.R. Profile hidden Markov models. *Bioinformatics* **14**, 755-763 (1998).
14. Suzek, B.E. et al. UniRef clusters: a comprehensive and scalable alternative for improving sequence similarity searches. *Bioinformatics* **31**, 926-932 (2014).
15. Steinegger, M. & Söding, J. Clustering huge protein sequence sets in linear time. *Nature Communications* **9**, 2542 (2018).
16. Li, Y. et al. Deducing high-accuracy protein contact-maps from a triplet of coevolutionary matrices through deep residual convolutional networks. *PLOS Computational Biology* **17**, e1008865 (2021).
17. Zheng, W. et al. Deep-learning contact-map guided protein structure prediction in CASP13. *Proteins: Structure, Function, and Bioinformatics* **87**, 1149-1164 (2019).
18. Zheng, W. et al. Detecting distant-homology protein structures by aligning deep neural-network based contact maps. *PLOS Computational Biology* **15**, e1007411 (2019).
19. He, B., Mortuza, S.M., Wang, Y., Shen, H.-B. & Zhang, Y. NeBcon: protein contact map prediction using neural network training coupled with naïve Bayes classifiers. *Bioinformatics* **33**, 2296-2306 (2017).
20. Shrestha, R. et al. Assessing the accuracy of contact predictions in CASP13. *Proteins: Structure, Function, and Bioinformatics* **87**, 1058-1068 (2019).
21. Jones, D.T. Protein secondary structure prediction based on position-specific scoring matrices11Edited by G. Von Heijne. *Journal of Molecular Biology* **292**, 195-202 (1999).

22. Jones, D.T. & Kandathil, S.M. High precision in protein contact prediction using fully convolutional neural networks and minimal sequence features. *Bioinformatics* **34**, 3308-3315 (2018).
23. Liu, Y., Palmedo, P., Ye, Q., Berger, B. & Peng, J. Enhancing Evolutionary Couplings with Deep Convolutional Neural Networks. *Cell Systems* **6**, 65-74.e63 (2018).
24. Adhikari, B., Hou, J. & Cheng, J. DNCON2: improved protein contact prediction using two-level deep convolutional neural networks. *Bioinformatics* **34**, 1466-1472 (2017).
25. Kamisetty, H., Ovchinnikov, S. & Baker, D. Assessing the utility of coevolution-based residue–residue contact predictions in a sequence- and structure-rich era. *Proceedings of the National Academy of Sciences* **110**, 15674 (2013).
26. Seemayer, S., Gruber, M. & Söding, J. CCMpred—fast and precise prediction of protein residue–residue contacts from correlated mutations. *Bioinformatics* **30**, 3128-3130 (2014).
27. Kaján, L., Hopf, T.A., Kalaš, M., Marks, D.S. & Rost, B. FreeContact: fast and free software for protein contact prediction from residue co-evolution. *BMC Bioinformatics* **15**, 85 (2014).
28. Buchan, D.W.A. & Jones, D.T. Improved protein contact predictions with the MetaPSICOV2 server in CASP12. *Proteins: Structure, Function, and Bioinformatics* **86**, 78-83 (2018).
29. Yan, R., Xu, D., Yang, J., Walker, S. & Zhang, Y. A comparative assessment and analysis of 20 representative sequence alignment methods for protein structure prediction. *Scientific Reports* **3**, 2619 (2013).
30. Yang, J. et al. The I-TASSER Suite: protein structure and function prediction. *Nature Methods* **12**, 7-8 (2015).
31. Burley, S.K. et al. RCSB Protein Data Bank: biological macromolecular structures enabling research and education in fundamental biology, biomedicine, biotechnology and energy. *Nucleic Acids Research* **47**, D464-D474 (2018).
32. Henikoff, S. & Henikoff, J.G. Amino acid substitution matrices from protein blocks. *Proceedings of the National Academy of Sciences* **89**, 10915 (1992).
33. Frishman, D. & Argos, P. Knowledge-based protein secondary structure assignment. *Proteins: Structure, Function, and Bioinformatics* **23**, 566-579 (1995).
